# Supplementary material
Source: PubMed Central journal article supplement (PMC10010047)

Fig 1B

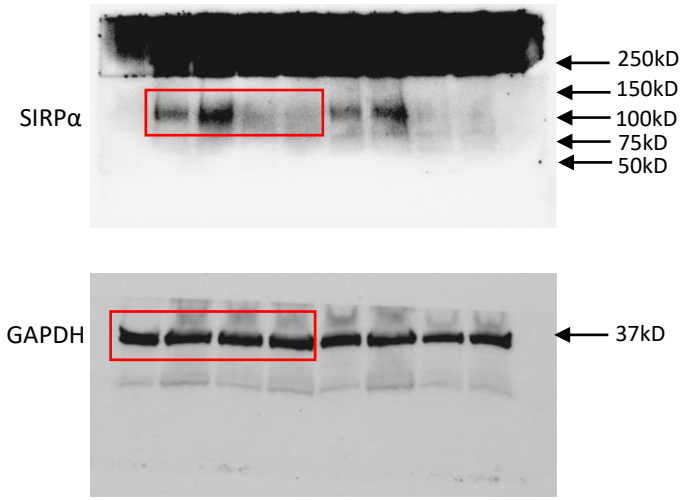

Fig 1D

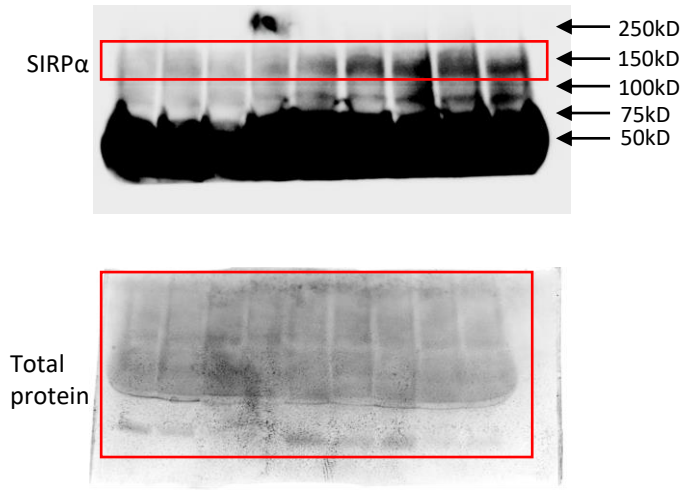

Fig 1E

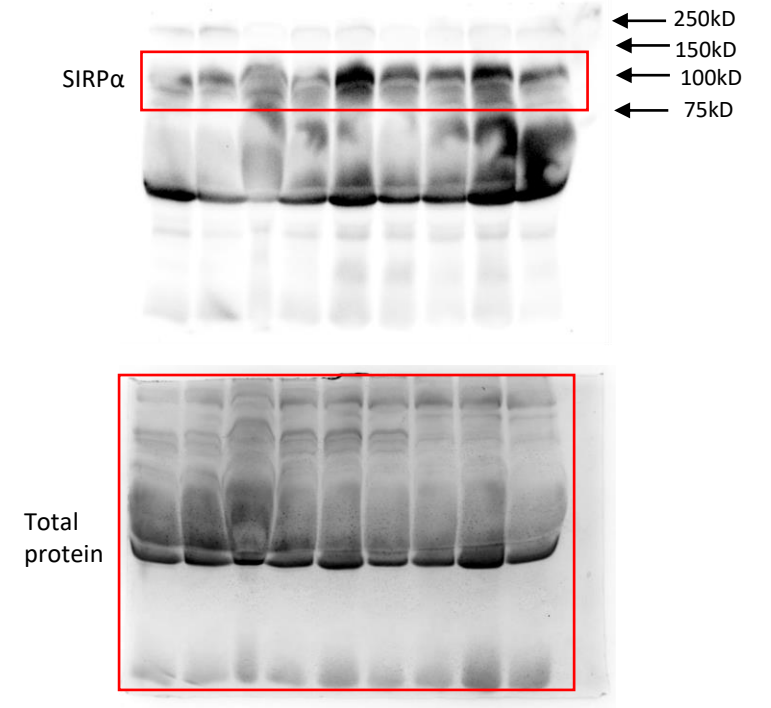

Fig 4B

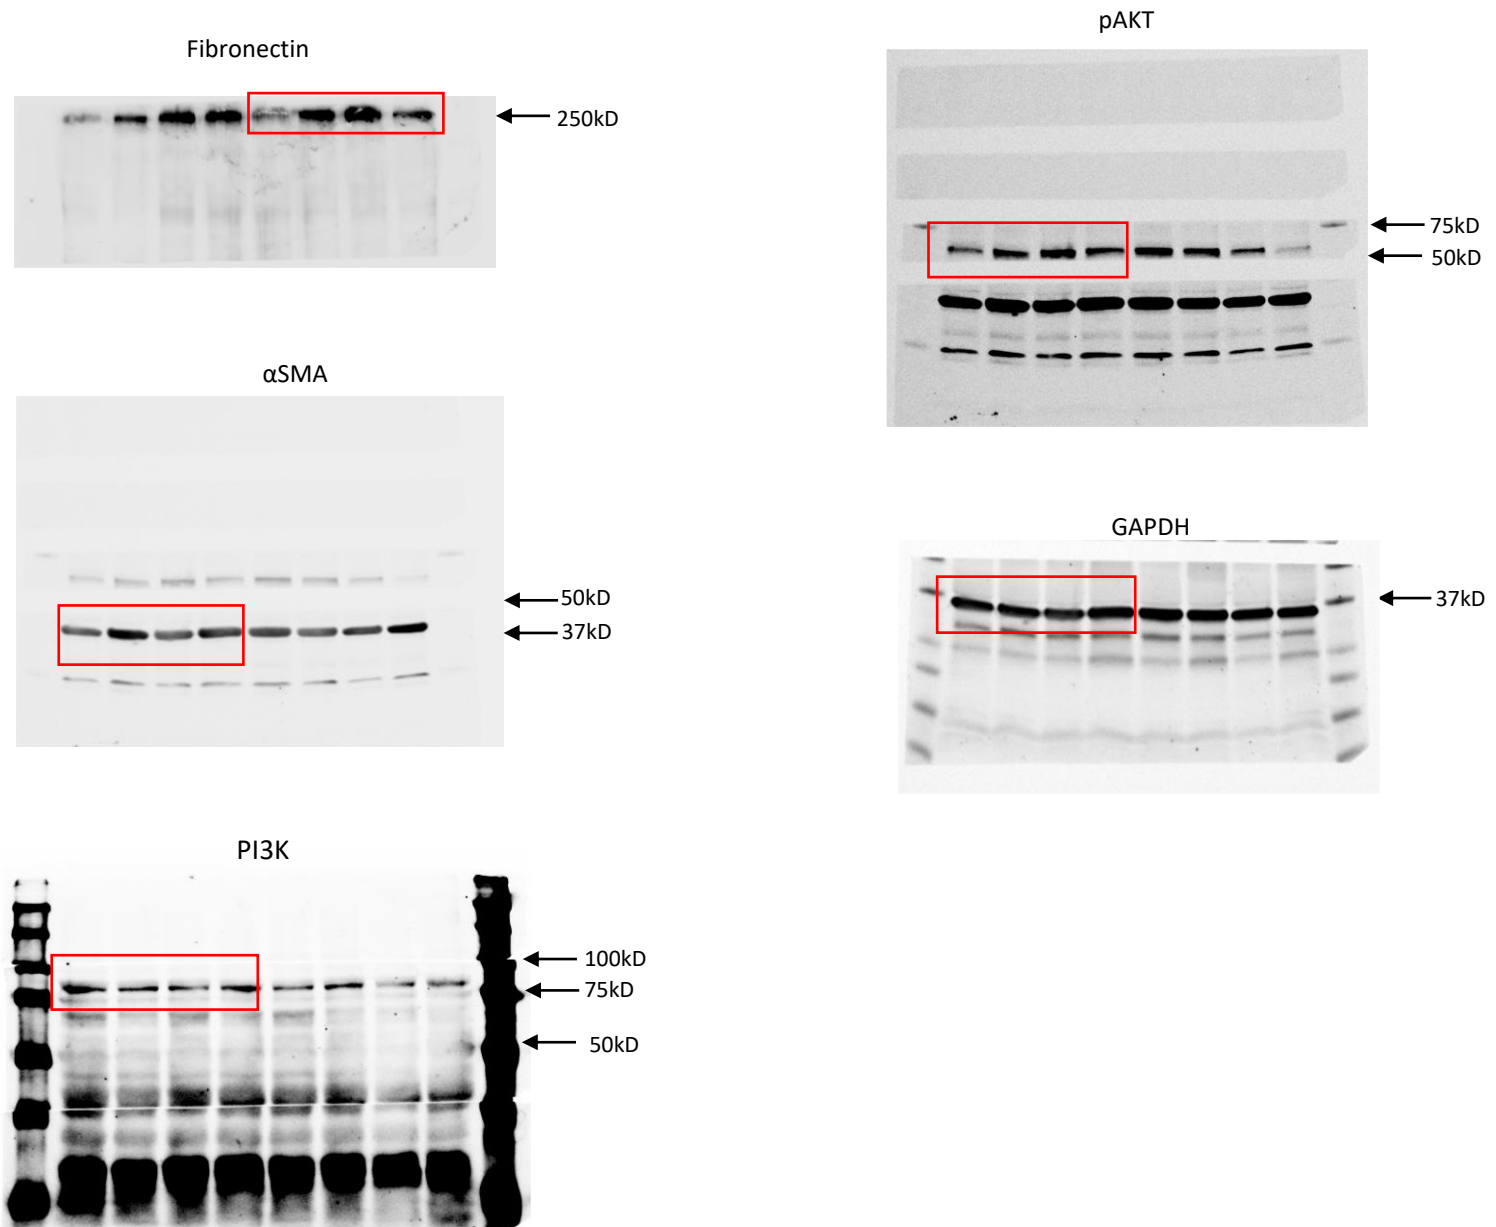

Fig 4C

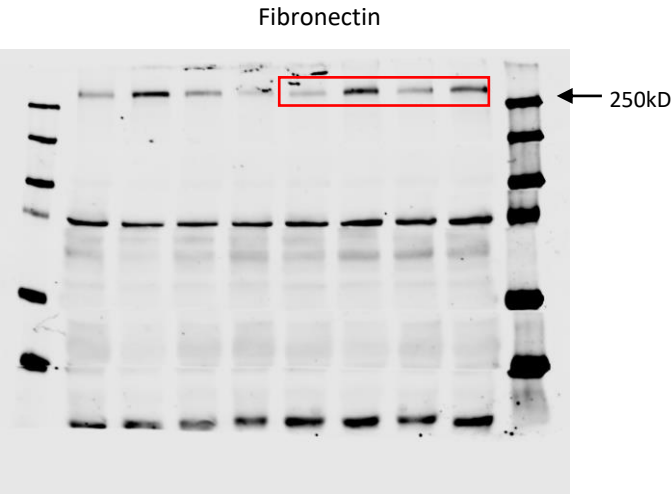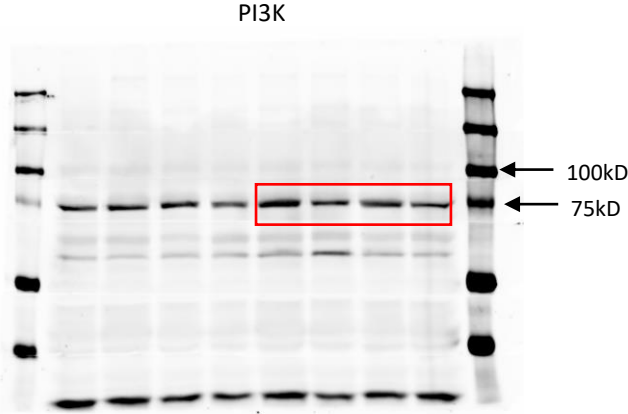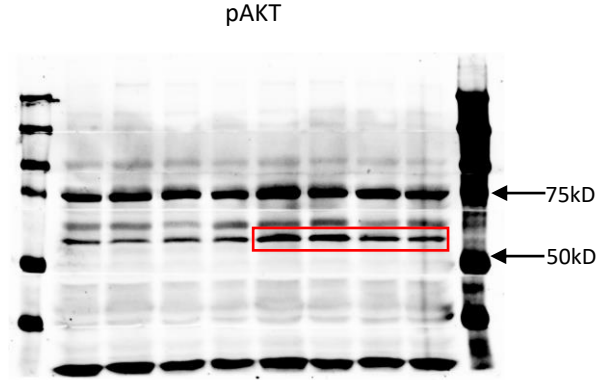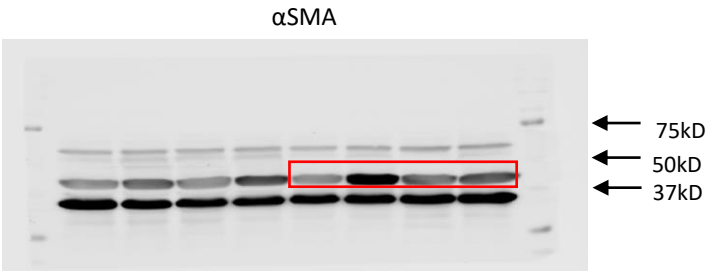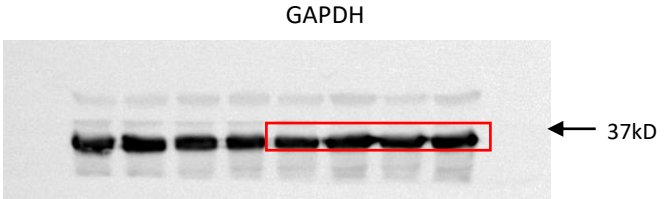

Fig 4D

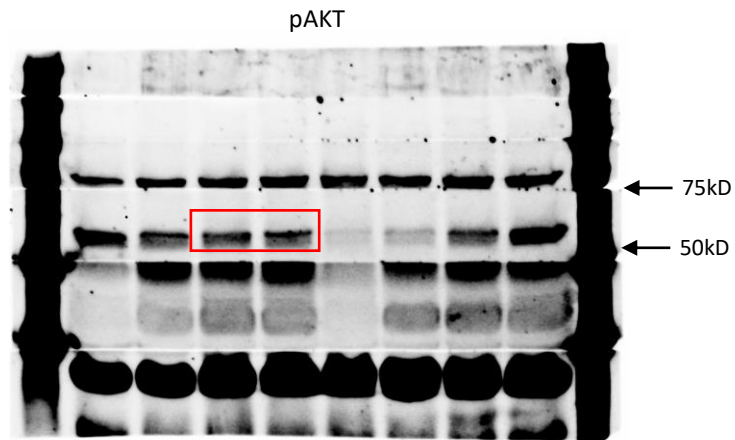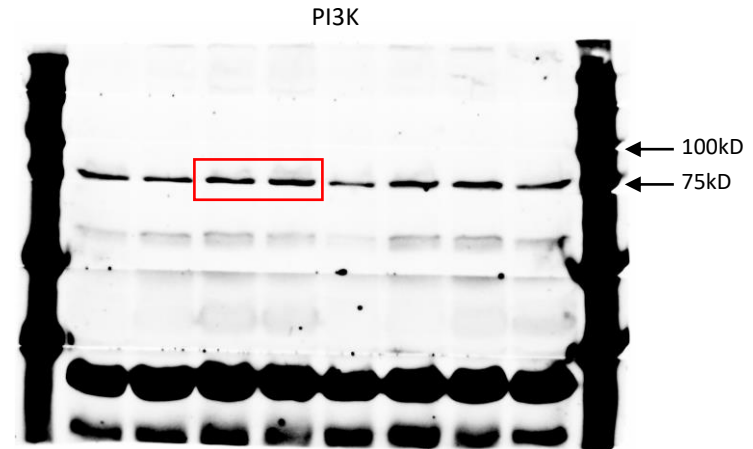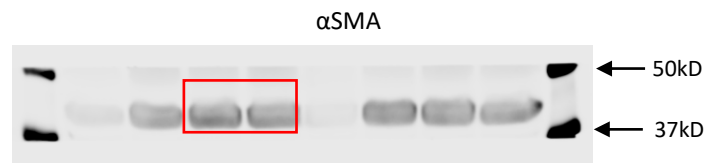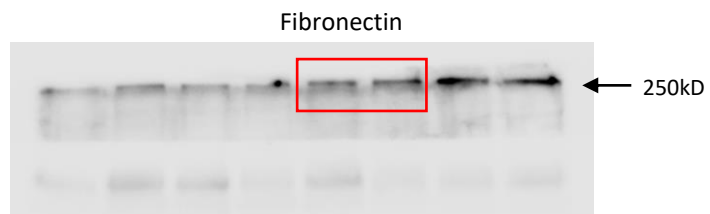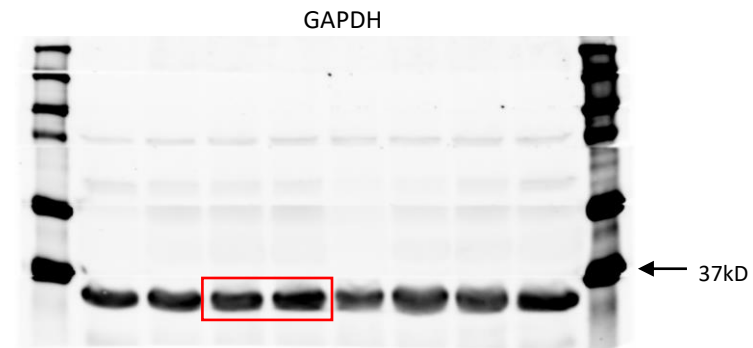

Fig 5A

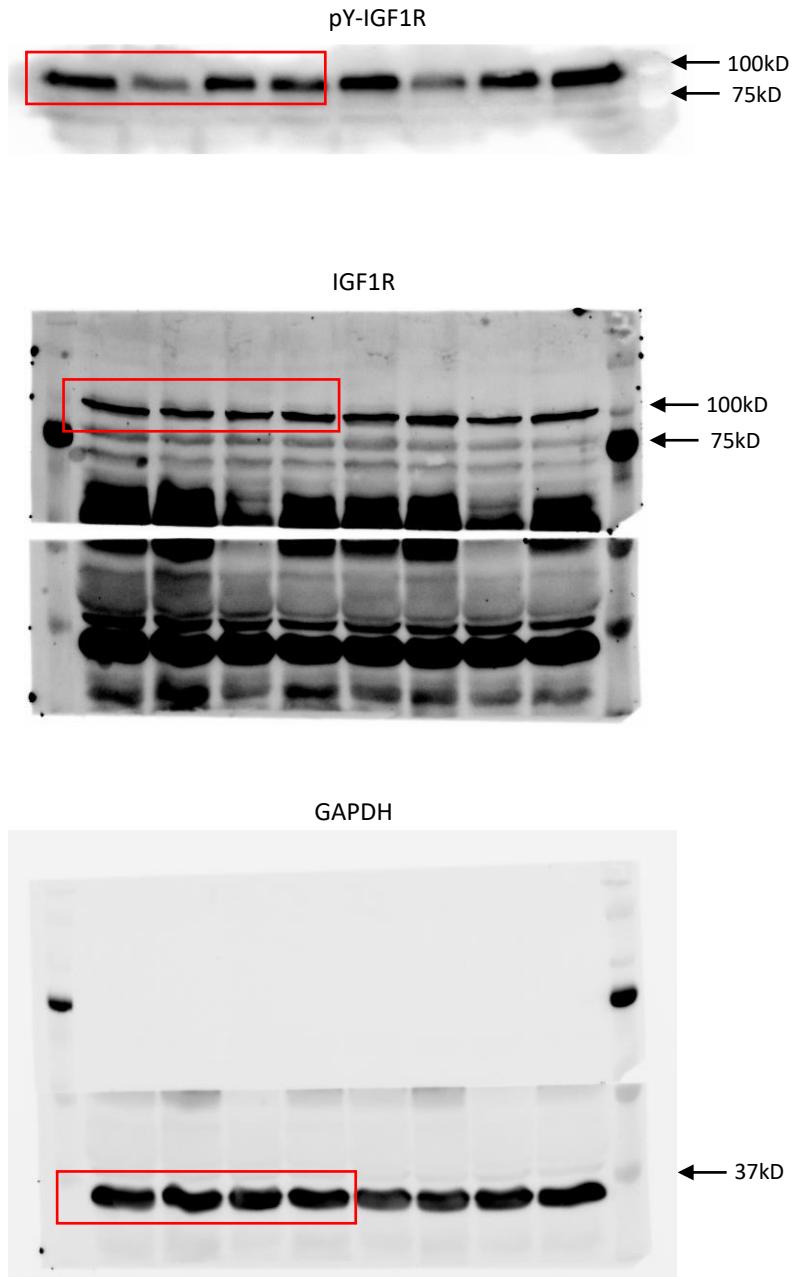

Fig 5B

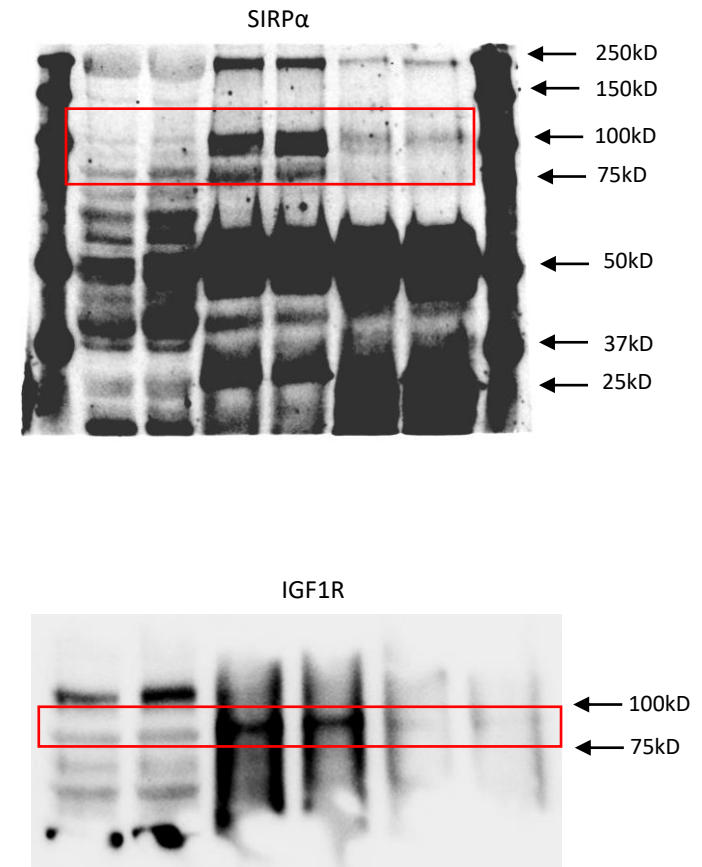

Fig 6A

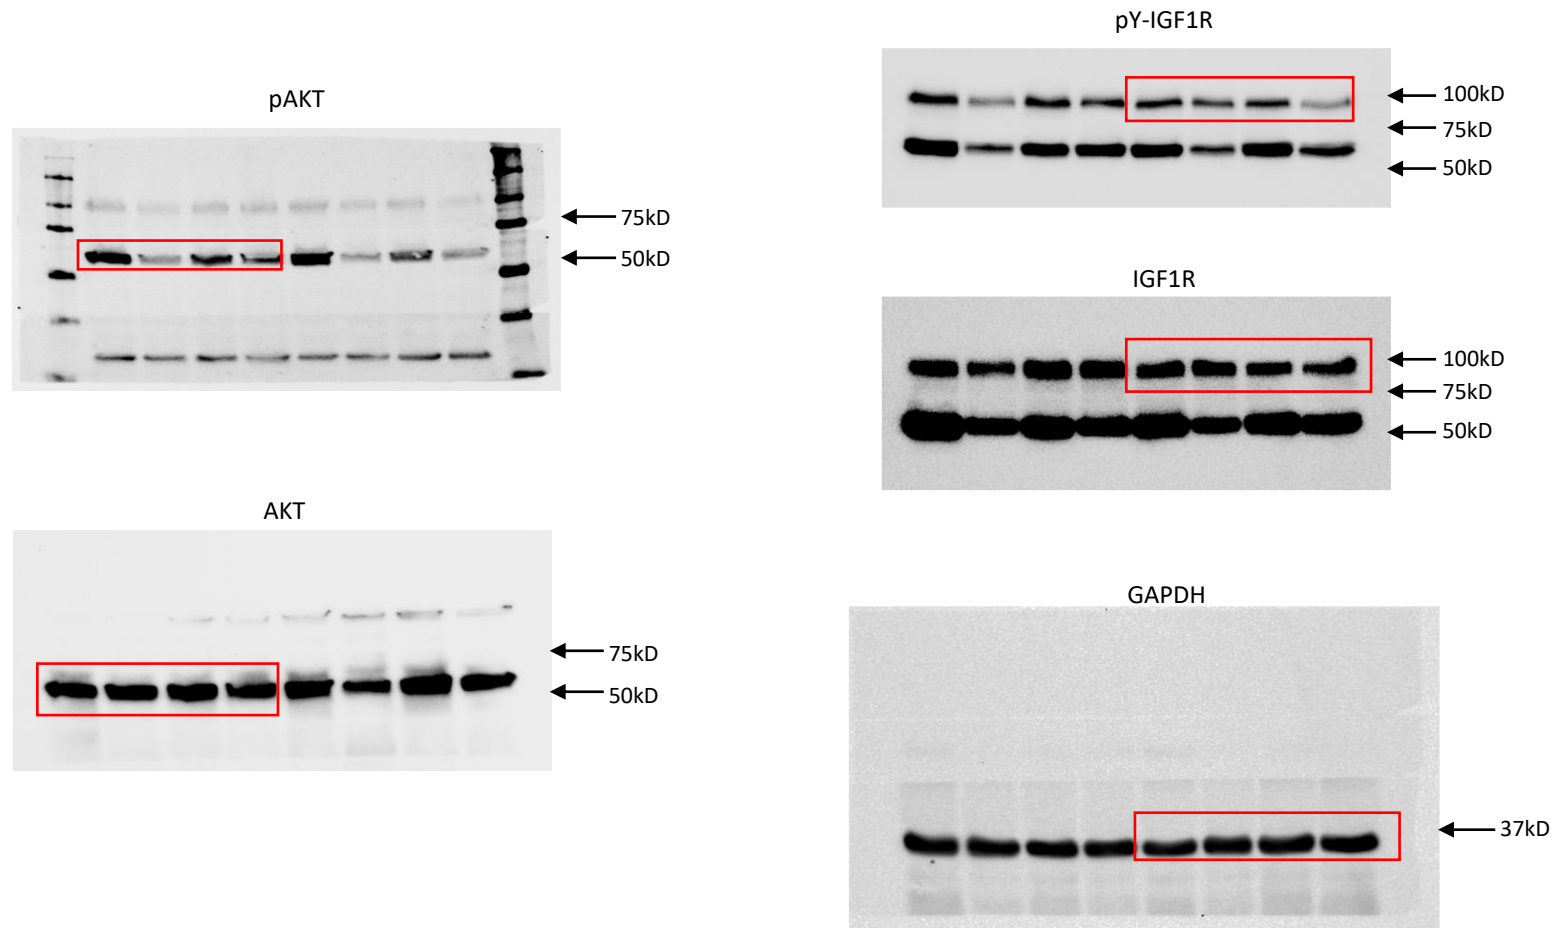

Fig 6B

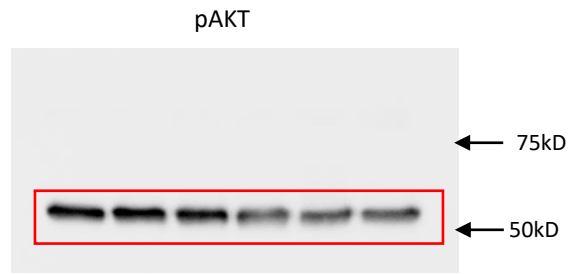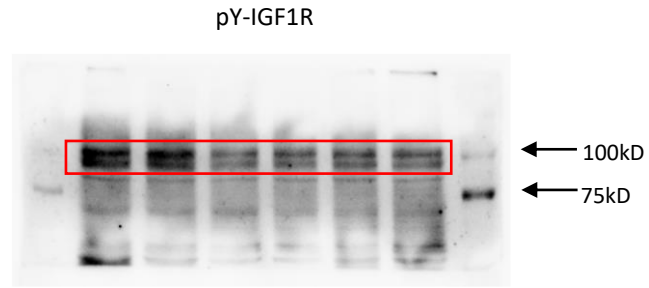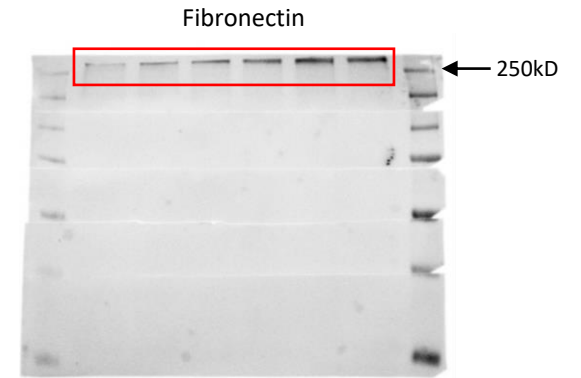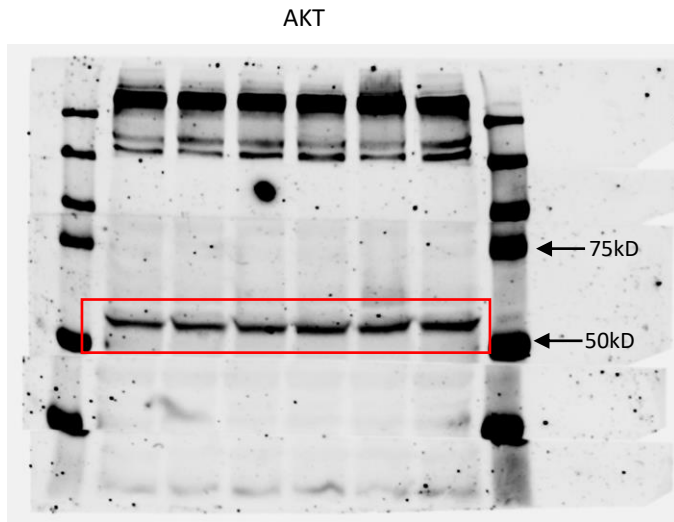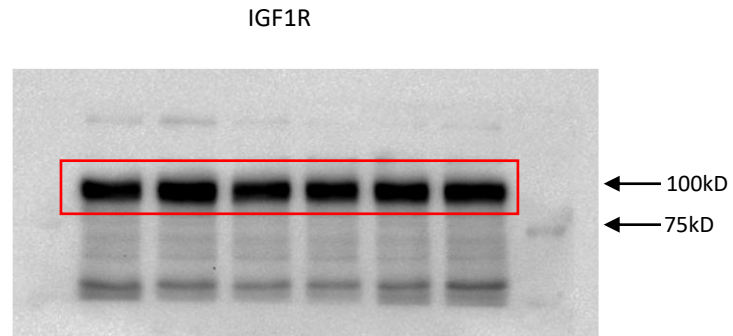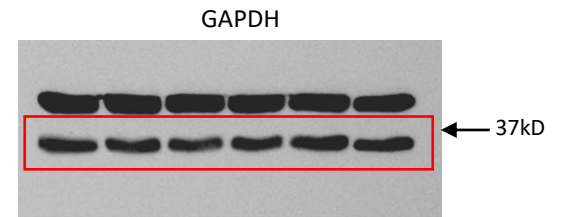

Fig 6C

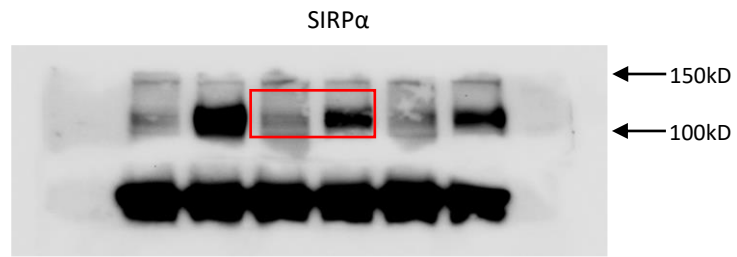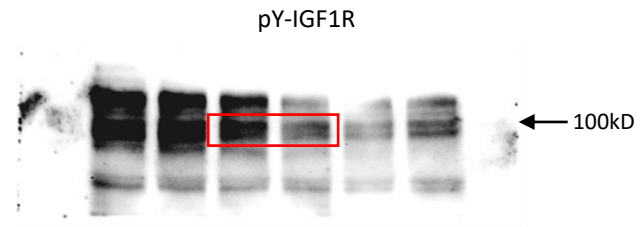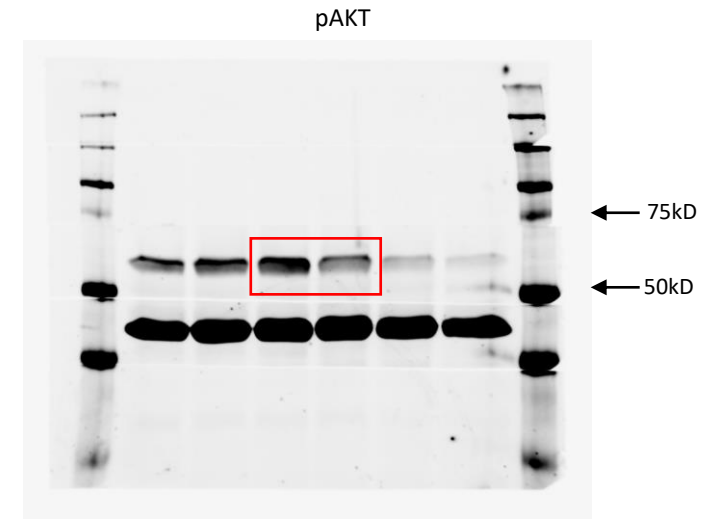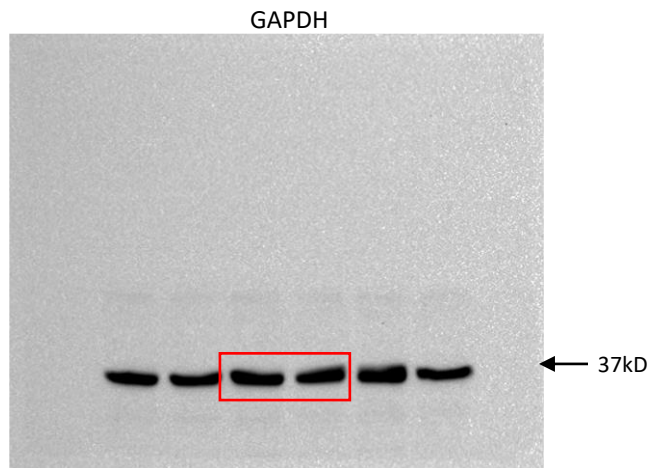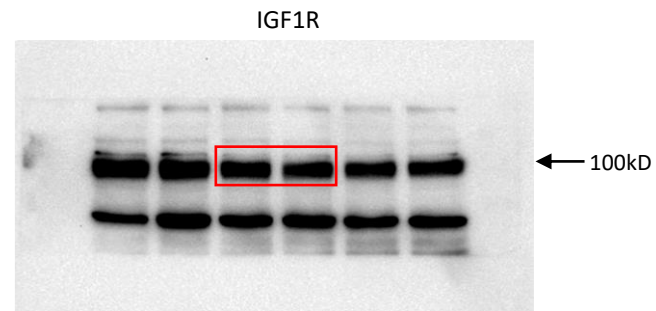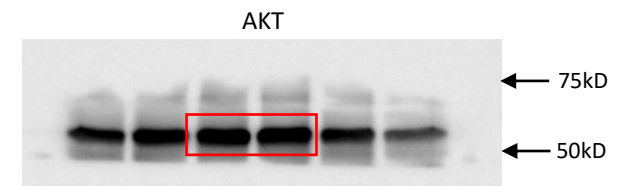



Fig 6D

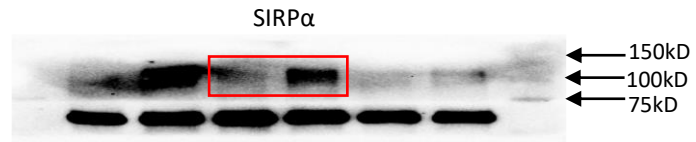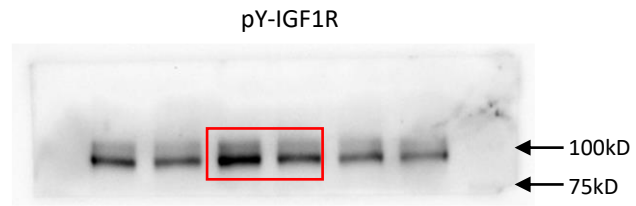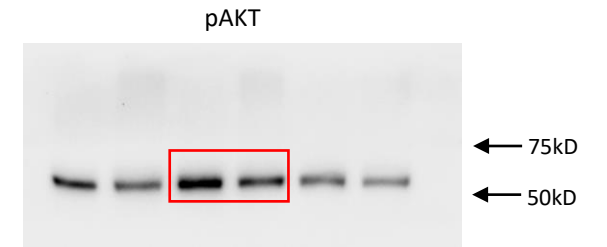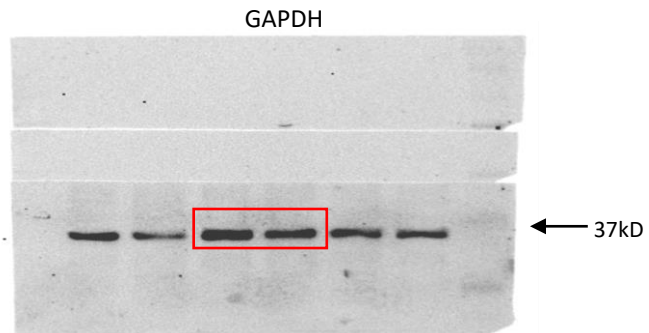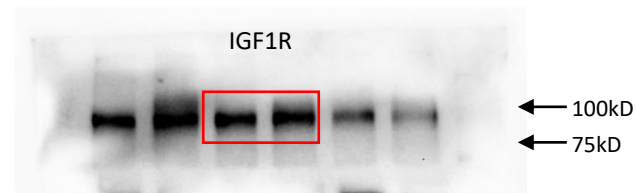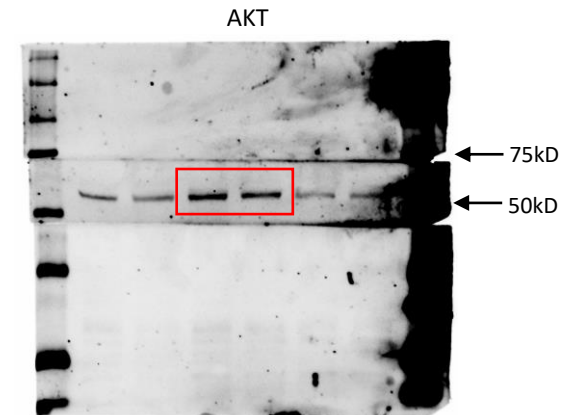

Fig 7A

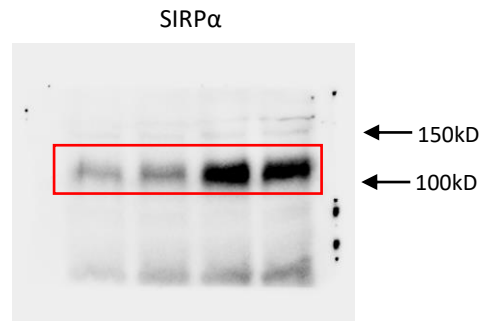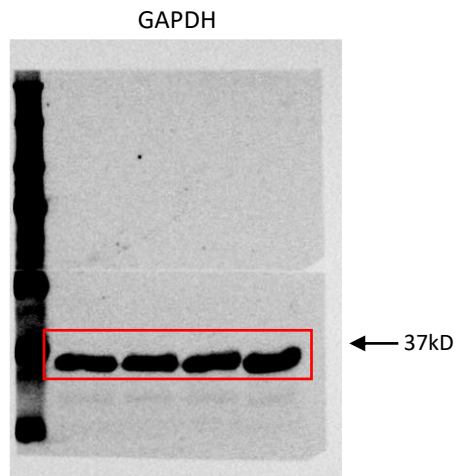

Fig 7B

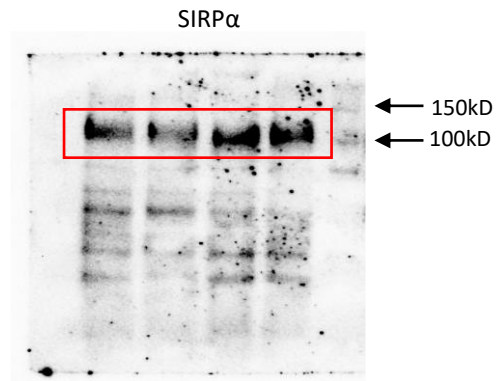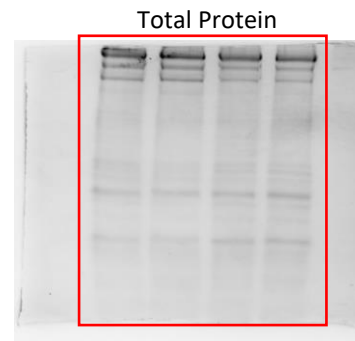

Fig 7C

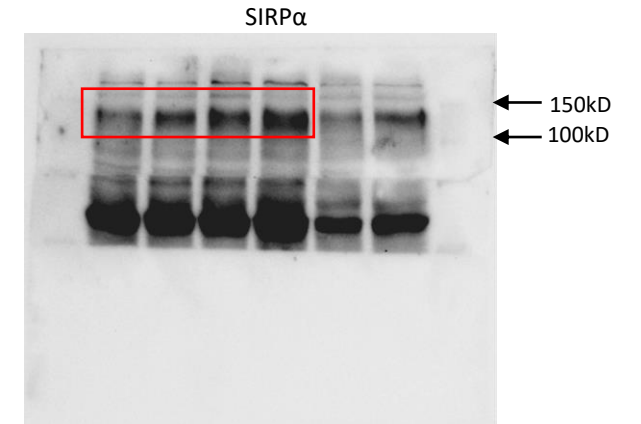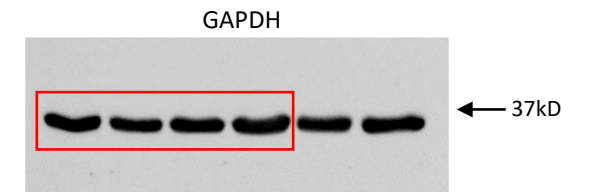

Fig 7D

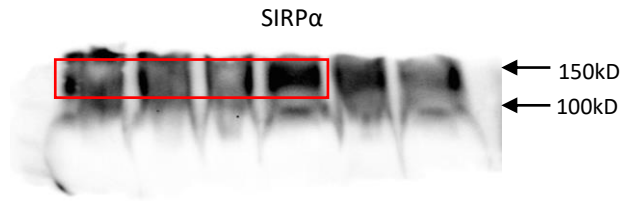

Total Protein

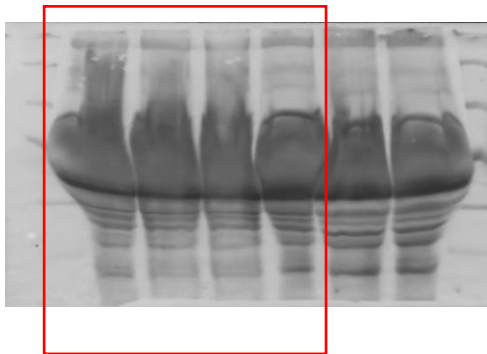

Fig 7E

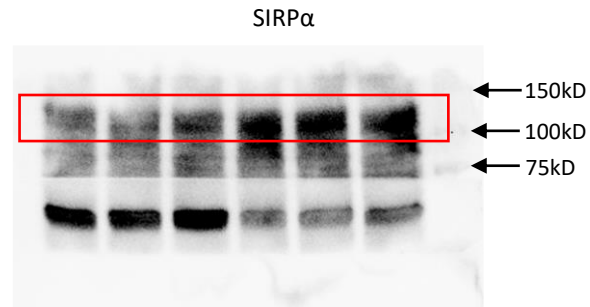

GAPDH

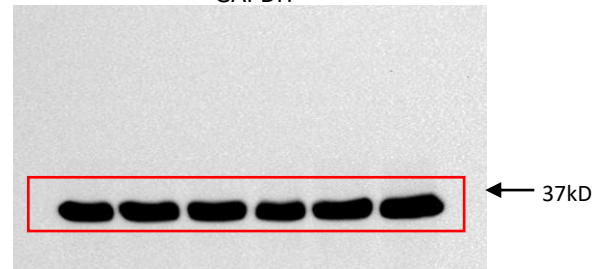

Fig 7F

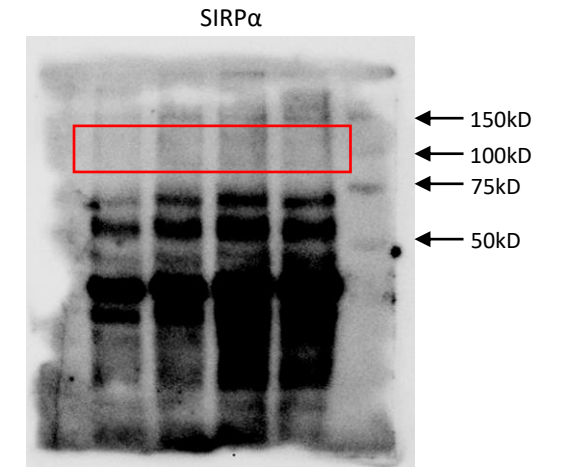

Total Protein

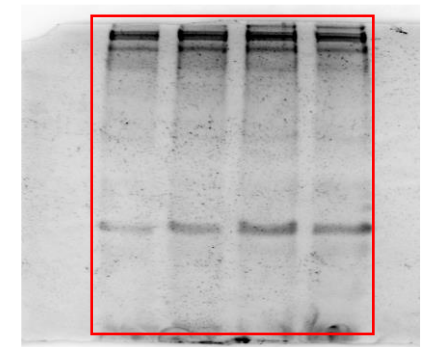

Fig S1B

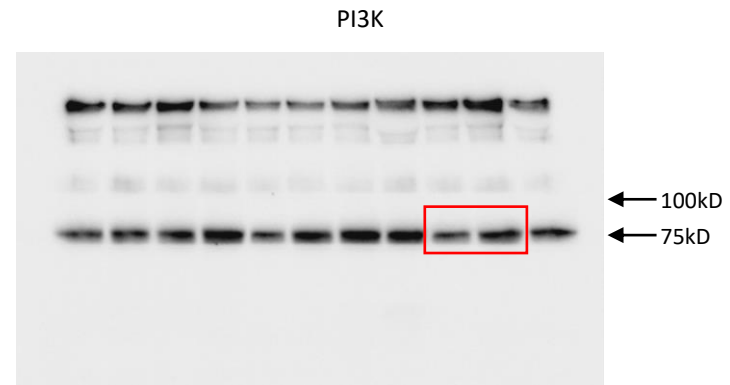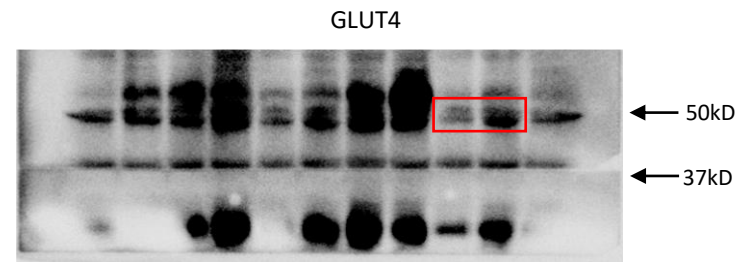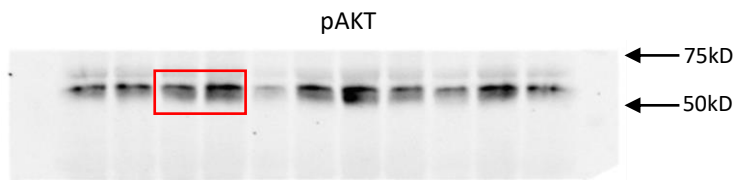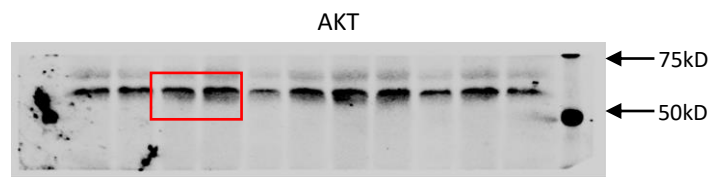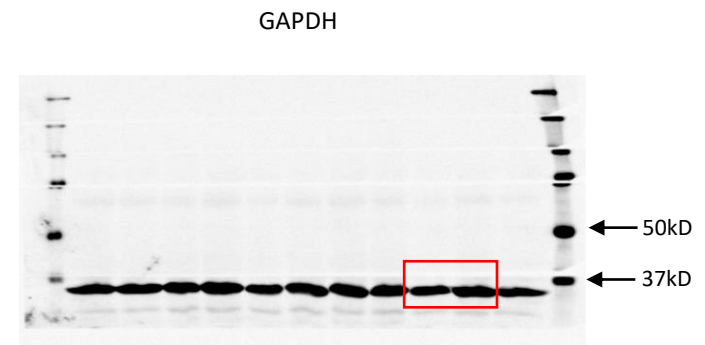

Fig S3

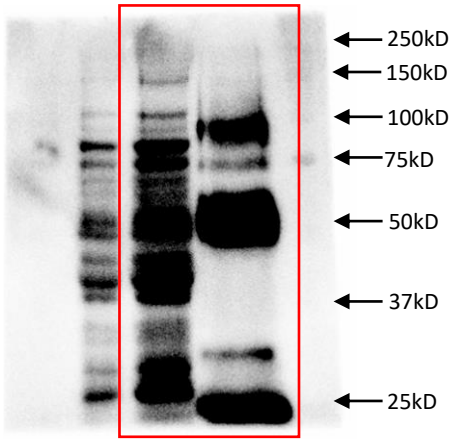

Fig S4

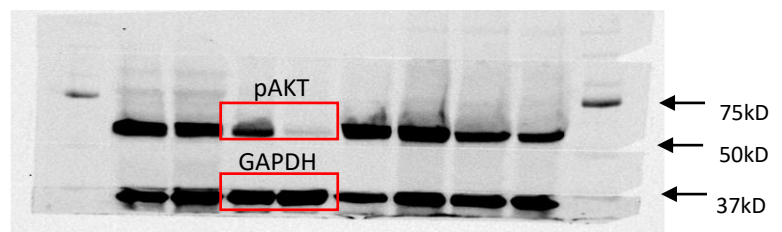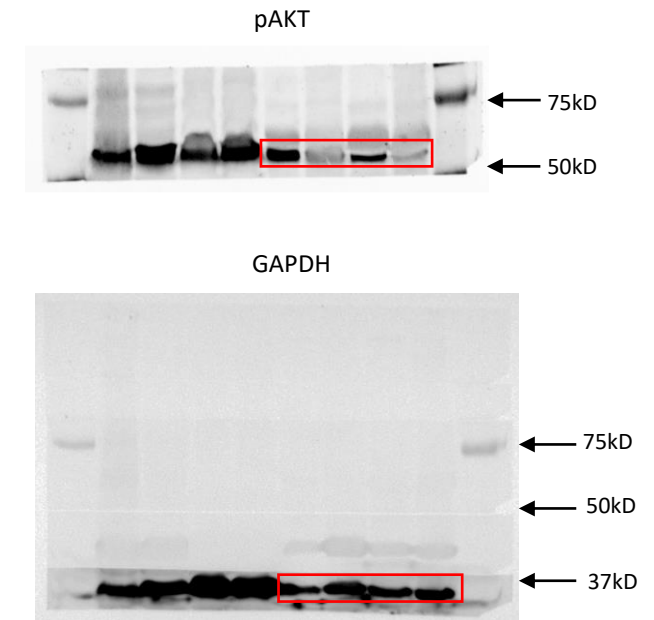

Fig S5A

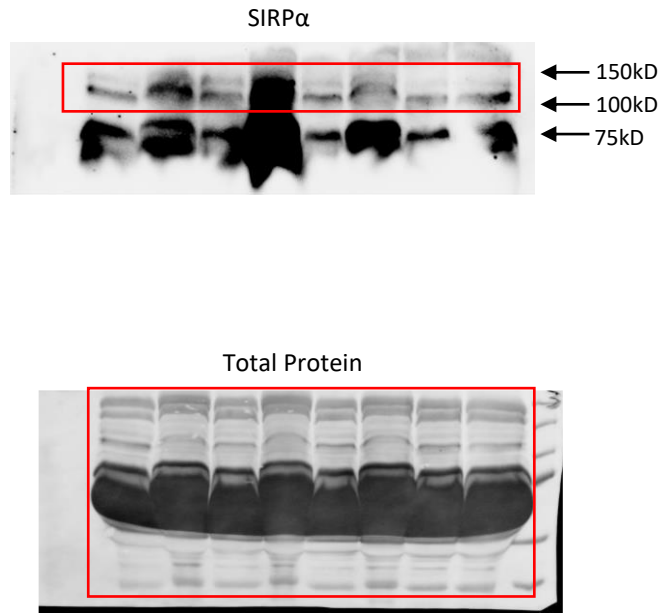

Fig S5B

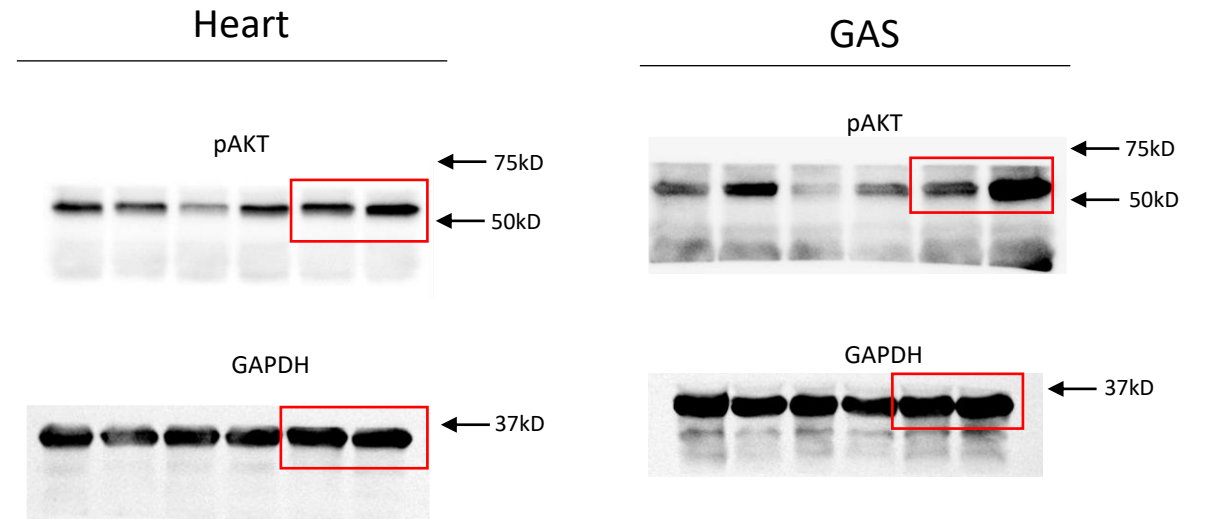

Fig S5C

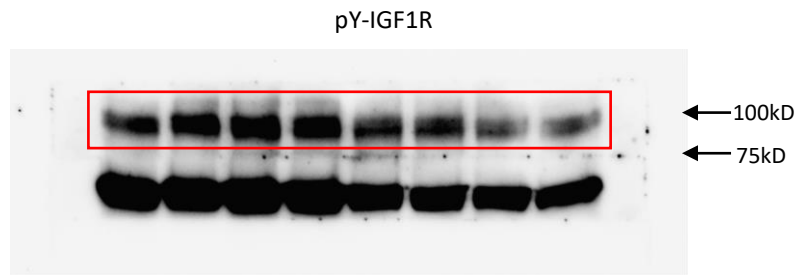

Fig S5D

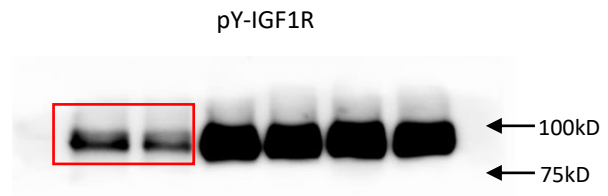

Fig S5E

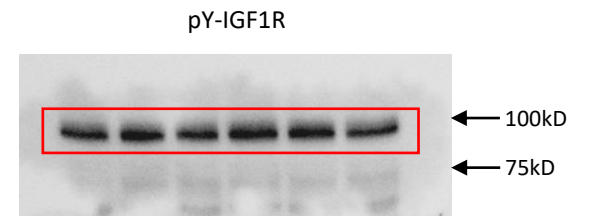

GAPDH

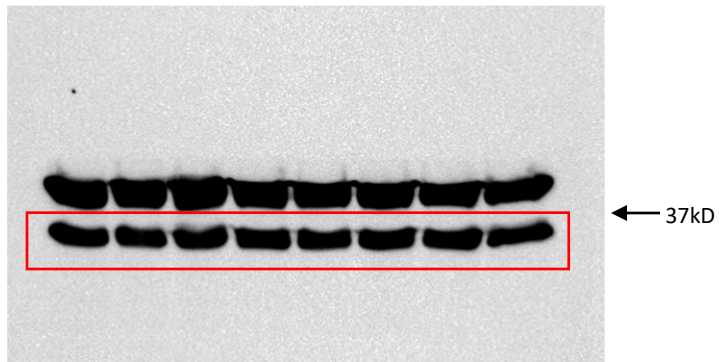

GAPDH

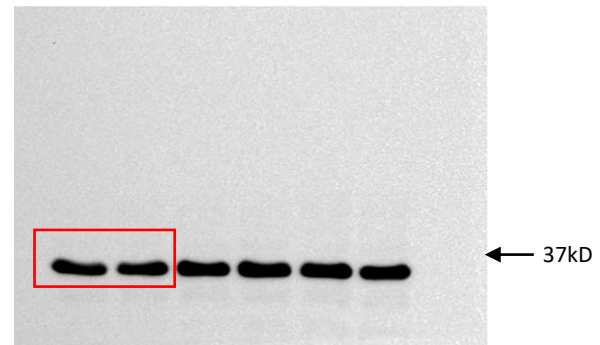

GAPDH

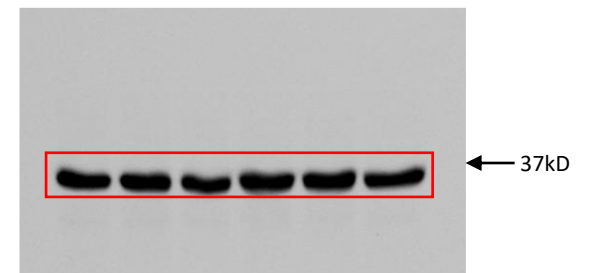

Fig S5F

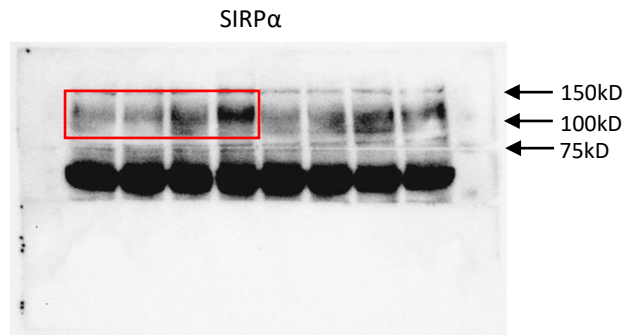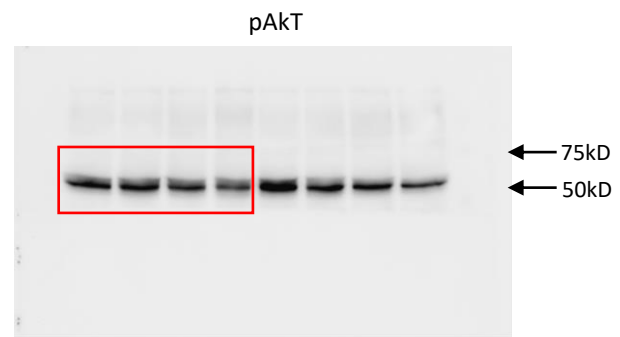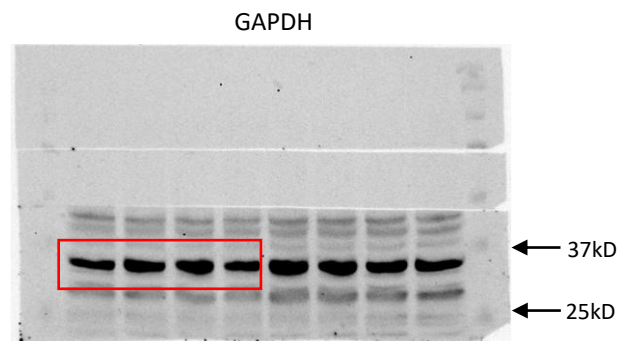

Fig S5G

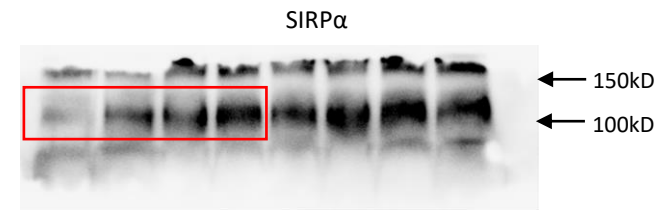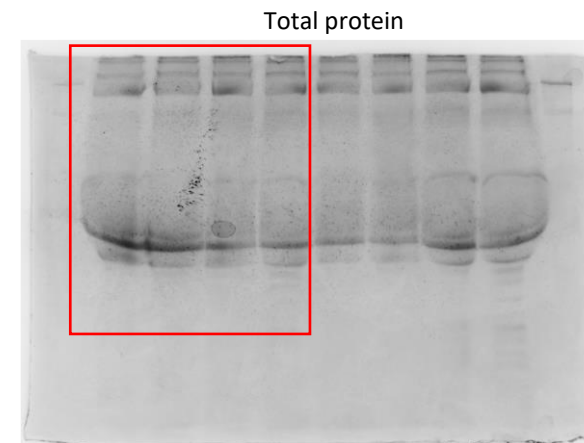

Supplement: NIHMS1813816-supplement-Uncut_Gel_Blots.pdf [file NIHMS1813816-supplement-Uncut_Gel_Blots.pdf]
