# Supplementary material
Source: PubMed Central journal article supplement (PMC10010047)
Supplement: NIHMS1813816-supplement-Supplemental_Material.pdf [file NIHMS1813816-supplement-Supplemental_Material.pdf]

## Supplemental Materials

### Reagents and antibodies

RNeasy Fibrous Tissue Mini Kit and RNase-Free DNase Set were from Qiagen (Valencia, CA); iScript Reverse Transcription Supermix for RT-PCR and iQ™ SYBR® Green Supermix were from Bio-Rad (Hercules, CA). Phosphatase inhibitor and protease inhibitor were from Roche (Indianapolis, IN). TRIzol was from Life Technologies (Carlsbad, CA); RIPA lysis and extraction buffer was from G-Biosciences (Louis, MO); Insulin was from Sigma Aldrich (St. Louis, MO). Green fluorescent protein (GFP) plasmid was from Lonza (Allendale, NJ); SIRP $\alpha$  plasmid cDNA was from Open Biosystems (Lafayette, CO); SIRP $\alpha$  recombinant protein was from R&D Systems (Minneapolis, MN). DMEM media and fetal bovine serum (FBS) were from Mediatech (Manassas, VA). The antibodies against GAPDH (#5174), SIRP $\alpha$  (#13379), p-AKT (S473, #4060), AKT (#2920), GLUT4 (#2213), PI3K (p85, #4257), pY-IGF1R (Tyr1135/1136, #2969), and IGF1R (#3027) were from Cell Signaling Technology (Danvers, MA). Fibronectin (#F3648) and  $\alpha$ SMA (#A5228) were from Sigma Aldrich (St. Louis, MO). IGF1R (#sc81464) and SIRP $\alpha$  (#sc-376884) for immunoprecipitation were from Santa Cruz (Dallas, TX). Picrosirius Red Stain Kit was from Polysciences (Warrington, PA).

### Chronic kidney disease model

To generate the CKD model, male adult mice were anesthetized at 8-10 weeks of age, and a subtotal nephrectomy was performed. Prior to nephrectomy the kidneys were freed from the surrounding tissue and then decapsulated to preserve the adrenal gland. Animals were subjected to nephrectomy in two staged surgery. In the first stage, ~70% of the left kidney was removed. The upper and lower poles of the kidney were partially resected, leaving one-third of the kidney. Seven days later, the right kidney was removed. The mice were fed standard rodent chow or 40% high protein diet as indicated in the figure legends. Sham-treated control mice underwent surgery without damaging the kidneys and were fed the similar diets. BUN and creatinine were measured in serum collected from the facial vein. 10-14 weeks after subtotal nephrectomy surgery, the chest of anesthetized mice was opened and infused with cold phosphate-buffered saline (PBS) which was introduced into the left ventricle prior to harvest. The hearts were weighed, and immediately freeze clamped, frozen in liquid nitrogen, and maintained at -80°C until analyzed.

### Systolic blood pressure measurements

A noninvasive blood pressure analysis system (BP-2000, Visitech Systems, Apex, NC) was used to measure indirect blood pressure and heart rate for conscious non-anesthetized mice using tail cuff method.

### Voluntary wheel exercise model

Seven weeks - old C57BL/6 male mice were obtained from Jackson laboratories (Jackson Labs, Bar Harbor, ME). These mice were fed *ad libitum* and kept on a 12-h light/12-h dark cycle in The University of Texas Health Science Center at Houston Institute of Molecular Medicine Animal Care Center. Two days after arrival, mice were assigned at random to individual cages with wheel runners (voluntary exercise) or infrared basal activity monitoring (sedentary) (STARR Life Sciences, Oakmont, PA). The mice were familiarized with their respective cages for 48 h and then exercise recording was started. Activity data were collected with VitalView (STARR Life Sciences, Oakmont, PA) and analyzed by ClockLabs (Actimetrics, Wilmette, IL). On day 6, 4 h after dark phase initiation, their hearts were harvested. These procedures were reviewed and approved by the Animal Welfare Committee of The University of Texas Health Science Center at Houston (AWC-14-0142).

### Hyperglycemia model

Mice were fasted for 16 h with free access to water, and subsequently injected with intraperitoneal (i.p.) glucose (2 g/kg, at 40-min intervals for 3 repeats). Blood was collected at 120 min after the first dose of

glucose injection, and the serum SIRP $\alpha$  levels in response to high-glucose stimulation *in vivo* were measured. Control mice were fasted for 16 h and treated with PBS at the same time points.

#### **SIRP $\alpha$ recombinant protein treatment of mice**

Eight weeks - old SIRP $\alpha$ <sup>fl/fl</sup> and skeletal muscle-specific SIRP $\alpha$  knockout (mSIRP $\alpha$ <sup>-/-</sup>) mice were treated with SIRP $\alpha$  recombinant protein (rSIRP $\alpha$ , 1  $\mu$ g/g) or the same volume of PBS control by left ventricle injection for 5 min and subsequent stimulation with 10 U/kg of insulin, which was allowed to circulate for 5 min before hearts were collected. For i.p. injection, mice were treated with 1.2  $\mu$ g/g rSIRP $\alpha$  or PBS control for 2 h with 5 min of insulin stimulation before harvest.

#### **Doppler ultrasound examination of mouse hearts**

Mice were anesthetized with 1.5–2.0% isoflurane in 2 L/min oxygen and positioned supine on a physiological monitoring platform which simultaneously regulated body temperature. Prior to imaging, hair was removed from the chest to reduce the attenuation of the ultrasound signal. Once the apex and aortic outflow tract were visualized in the same plane on B-mode in the parasternal long-axis view, the probe was rotated 90° to obtain a short-axis view at the papillary muscles level, the M-mode beam was placed through the midline of the left ventricle, and M-mode images collected. Thereafter, transmitral flow velocities were recorded from the apical view using pulse wave Doppler by setting the sample volume in the mitral orifice. In the spectral waveforms, early (E) and late (A) diastolic transmitral velocities, and E/A ratio were recorded. In the same view, tissue Doppler imaging was used to assess tissue velocity of the mitral annulus. The sampling volume was placed at the level of the mitral annulus in the septum. The E and A diastolic velocities were recorded. For the echocardiographic parameters, an average of three measurements was used for each data point when possible.

#### **Extracellular and intracellular treatment of SIRP $\alpha$ in myocytes**

The C2C12 mouse myoblast cell line was purchased from American Type Culture Collection (Manassas, VA) and maintained in DMEM media containing 1% penicillin-streptomycin (ThermoFisher, Logan, UT) and 10% (v/v) FBS. Cells were seeded in 6-well plates and cultured at 37 °C under 5% CO<sub>2</sub>. Myotube differentiation was initiated by switching confluent C2C12 myoblasts to DMEM containing 2% horse serum (ThermoFisher, Logan, UT). The differentiation media were changed every two days. For extracellular treatment of SIRP $\alpha$ , fully differentiated myotubes were starved overnight and treated with 1  $\mu$ g/mL SIRP $\alpha$  recombinant protein for 15, 30 min, and 1, 6, and 24 h. Subsequently, cellular protein was extracted and stored at -80°C. For intracellular treatment of SIRP $\alpha$ , C2C12 myoblasts (10<sup>6</sup>) or HL-1 cardiomyocytes (cultured and maintained as described<sup>48</sup>) were electroporated with 1.5  $\mu$ g GFP control or 1.5  $\mu$ g SIRP $\alpha$  plasmid using Neon Transfection System (Invitrogen, Carlsbad, CA). The cultured cells were maintained in DMEM or Claycomb media containing 10% FBS, respectively, for 24 h and harvested. For pY-IGF1R evaluations, C2C12 myotubes or myoblasts were cultured in low glucose (5 mM) DMEM in these extracellular and intracellular treatment.

#### **High glucose treatment of cells**

C2C12 myoblasts were maintained in high glucose (25 mM) DMEM media containing 10% FBS. Confluent C2C12 myoblasts were differentiated in low glucose (5 mM) DMEM plus 2% horse serum. Fully differentiated myotubes were starved overnight in low glucose DMEM media and subsequently treated with high glucose DMEM for 48 h. Cell or media protein was extracted with RIPA or acetone, respectively, and stored at -80°C.

HL-1 cardiomyocytes were cultured to confluency in Claycomb media (containing 22 mM glucose) supplemented with 10% FBS, 0.1 mM norepinephrine, 2 mM L-glutamine, and 1% penicillin/streptomycin, starved for 6 h and treated with high glucose (90 mM) for 1, 6, 24, or 48 h. Cell or media protein was extracted with RIPA or acetone, respectively, and stored at -80°C.

3T3-L1 cells were purchased from American Type Culture Collection (Manassas, VA) and cultured in preadipocyte media (DMEM/F12 containing 10% FBS and 1% penicillin/streptomycin) in 5% CO<sub>2</sub> in a humidified incubator at 37°C. The cells were grown to confluency in 6 wells and then treated by induction media (1.5 µg/mL insulin, 1 µM dexamethasone, 500 µM IBMX, and 1 µM rosiglitazone in the preadipocyte media). Three days after induction, cultured cells were maintained in media (1.5 µg/mL insulin in the preadipocyte media with 5 mM low glucose) for 4 days of differentiation. Fully differentiated adipocytes were serum starved overnight in low glucose DMEM, subsequently the cells were treated with high glucose (25 mM) DMEM for 48 h. Cell or media protein was extracted with RIPA or acetone, respectively, and stored at -80°C.

#### Uremic toxin, p-cresol sulfate, treated HL-1 cardiomyocytes

HL-1 cardiomyocytes were cultured to confluency as previously described, starved overnight and treated with uremic toxin, p-cresol sulfate (PCS) with a concentration of 40 µg/mL (212 µM) for 1, 6, 24 h. Cell or media protein was extracted with RIPA or acetone, respectively, and stored at -80°C.

#### Reverse transcription-quantitative polymerase chain reaction (PCR)

Total RNA of heart was extracted using TRIzol and purified with RNeasy Fibrous Tissue Mini Kit. First-strand cDNA was synthesized from 1 µg DNase-treated total RNA using Reverse Transcription Supermix for reverse transcription-quantitative polymerase chain reaction (RT-qPCR). The mRNA levels were evaluated by qPCR using SYBR Green Supermix. Reactions of qPCR were performed in 96-well format using a CFX96™ Real-Time System (Bio-Rad, Hercules, CA). The reaction volume was 10 µL, including 5 µL SYBR Green Supermix, 2 µL 2.5 µM primer, and 1 µL cDNA. The following thermal cycling profile was used: 95°C 3 min; 40 cycles of 95°C for 15 s, 60°C for 30s; followed by 55°C to 95°C increment for dissociation curve analysis. The relative mRNA levels were calculated using the comparative 2<sup>-ΔΔCT</sup> method and normalized to Cyclophilin mRNA. Sequence information of mouse primers is as follows:

|             |                                |                                    |
|-------------|--------------------------------|------------------------------------|
| Cyclophilin | F: 5'-CCGATGACGAGCCCTTG-3'     | R: 5'-TCTGCTGTCTTTGGAACCTTGTGTC-3' |
| SIRPα       | F: 5'-CTCTGTGGACGCCTGTAA-3'    | R: 5'-GATGCTGCTGCTGTTGTT-3'        |
| ANP         | F: 5'-GAGAGAAAGAAACCAGAGTG-3'  | R: 5'-GTCTAGCAGGTTCTTGAAATC-3'     |
| BNP         | F: 5'-AATTCAAGATGCAGAAGCTG-3'  | R: 5'-GAATTTTGAGGTCTCTGCTG-3'      |
| UCP3        | F: 5'-CAAGAAATGCCATTGTCAAC-3'  | R: 5'-GAAGTTGTCAGTAAACAGGTG-3'     |
| MHCα        | F: 5'-AATCCTAATGCAAACAAGGG-3'  | R: 5'-CAGAAGGTAGGTCTCTATGTC-3'     |
| MHCβ        | F: 5'-GATGATCTATACTACTCGGG-3'  | R: 5'-TGATGAGGATGGACTGATTC-3'      |
| PGC1α       | F: 5'-TCCTCTTCAAGATCCTGTTAC-3' | R: 5'-CACATACAAGGGAGAATTGC-3'      |
| PPARα       | F: 5'-GAATCCACGAAGCCTACC-3'    | R: 5'-GCCATACACAAGGTCTCC-3'        |
| CPT1b       | F: 5'-CTGGAGGTGGCTTTGGTCC-3'   | R: 5'-GGGCGTTCGTCTCTGAACTTG-3'     |
| ACC1        | F: 5'-ATTGGGCACCCAGAGCTA-3'    | R: 5'-CCCGCTCCTTCAACTTGCT-3'       |
| GLUT1       | F: 5'-CTTGCTTGTAGAGTGACGATC-3' | R: 5'-CAGTGATCCGAGCACTGCTC-3'      |
| GLUT4       | F: 5'-GAGCCTGAATGCTAATGGAG-3'  | R: 5'-GAGAGAGAGCGTCCAATGTC-3'      |

#### Western blots

We homogenized 30 mg heart tissue for 1 min in 300 µL cold RIPA buffer supplemented with protease and phosphatase inhibitor cocktails. The homogenates were incubated on ice for 10 min and then centrifuged (15,600 g) at 4°C for 15 min. The supernatants were used as whole cell lysates. Protein concentration was determined by Pierce BCA Protein Assay. An equal amount of protein (80-100 µg) was separated on sodium dodecyl sulfate- polyacrylamide gel electrophoresis in tris/glycine buffer, transferred to nitrocellulose

blotting membrane, blocked for 20 min, and blotted with all primary antibodies diluted (1:1000) except GAPDH (1:2000) and Fibronectin (1:3000) in blocking buffer overnight at 4°C. After 3 times of washing in TBS containing 0.1% Tween20, the membrane was incubated in secondary antibody diluted with TBS containing 0.1% Tween20 for 1 h and washed mentioned earlier above, and the protein was detected using the ChemiDoc MP Imaging System (Bio-Rad, Hercules, CA). The protein of interest was analyzed using Image Lab 6.0 (Bio-Rad, Hercules, CA), and the protein intensities were quantified using NIH ImageJ software. GAPDH was used as an internal standard unless otherwise specified to quantify western blot bands.

### **Immunoprecipitation**

Heart tissue (20 mg), was homogenized in 200  $\mu$ L immunoprecipitation (IP) lysis buffer (containing 20 mM Tris-HCL pH 8.0, 137 mM NaCl, 0.5% NP-40, 2 mM EDTA, 0.05% Triton X-100, phosphatase and protease inhibitors) and placed on rotation shaker at 4°C for 1 h. Supernatant was obtained by centrifugation (15,600 g) for 20 min at 4°C. Immunoprecipitation was performed by adding 4  $\mu$ g of anti-SIRP $\alpha$  (Santa Cruz) or anti-IGF 1R (Santa Cruz) to 1 mg heart lysates in IP lysis buffer. After continuous agitation overnight at 4°C, 20  $\mu$ L of Protein A/G Plus beads were added. The mixture was agitated in a rotational shaker for 2 h at 4°C. Following centrifugation at 450 g for 5 min, the supernatant was removed. The beads were washed five times with IP lysis buffer and western blots or Octet RED384 assay development were performed.

### **Octet RED384 assay development**

The binding affinity between IGF1R IP lysates and purified recombinant SIRP $\alpha$  (rSIRP $\alpha$ ) was performed using Octet RED384 System (Fremont, CA, USA). The assay temperature was maintained at 30°C on the Octet RED384 system. Purified Fc-containing ligand rSIRP $\alpha$  was immobilized onto Anti-Mouse IgG Fc Capture Biosensor at a concentration of 2.5  $\mu$ g/mL for 10 min. IGF-1R IP protein was introduced into Fortébio's kinetic buffer in order to obtain a serial dilution of the analyte (5.6, 2.8, 1.4  $\mu$ M). Fortébio's kinetic buffer was used as the reference control to determine the background signal. The binding assay was conducted in a 384-well tilted-bottom microplate (Fortébio). The Octet RED384 assay method was set as follows: the biosensors were first washed in PBS for 2 min for baseline stabilization. The biosensors were then dipped in diluted rSIRP $\alpha$  solution for 10 min, followed by 2.5 min washing in kinetic buffer to establish a new baseline. The biosensors were then transferred into different concentrations of IGF1R lysates for 5 min (association) followed by another 5 min washing procedure (dissociation) in kinetic buffer. Data were collected and analyzed using Octet Data analysis HT software 11.1 (Fremont, Menlo Park, CA). Binding kinetics were measured using one-to-one binding site model to determine the observed rate constant (kobs), the association rate constant (ka), and the dissociation rate constant (kdis). The Octet data analysis software uses the rate constant parameters to calculate the reported binding affinity constant, KD (kdis/ka).

### **Section and staining**

For immune histochemical staining, tissues were fixed in 10% formalin, embedded in paraffin, and cut into 6  $\mu$ m sections on slides. The slides were incubated with the 1:50 diluted anti-SIRP $\alpha$  antibody (Cell Signaling Technology). Photomicrographs of heart are shown by H&E staining. Myocardial fibrosis of the CKD hearts was evaluated by picrosirius red-stained sections which were scanned using a microscope equipped with a digital camera (Nikon, Melville, NY), and evaluation was performed using NIS-Elements Br 3.0 software and quantified using NIH ImageJ software. The collagen-stained area was calculated as a fold change of the total area, as previously described<sup>49</sup>.

## Supplemental Figures

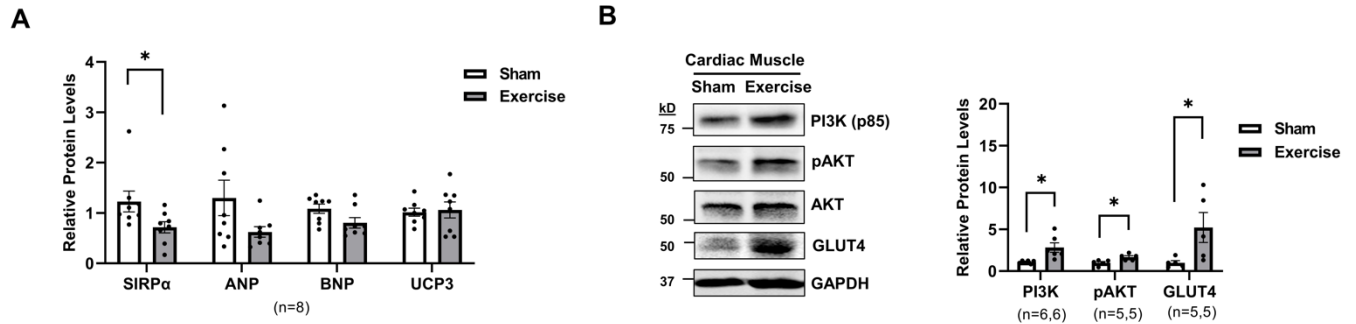

**Figure S1. Acute exercise decreases SIRP $\alpha$  expression in cardiac muscle and improves insulin sensitivity.** (A) Expression levels of SIRP $\alpha$ , ANP, BNP, and UCP3 were analyzed by quantitative real time-PCR and normalized relative to cyclophilin. (B) Heart lysates from Sham and Exercise treated mice were immunoblotted to detect PI3K (p85), pAKT, AKT, GLUT4, and GAPDH and representative immunoblots of averaged data are shown (left panel) with relative densities to GAPDH or pAKT to AKT are shown (right panel). Statistical significance was calculated using unpaired two-tailed Student's *t*-test (A-B). Values are expressed as means  $\pm$  SEM; \**p*<0.05.

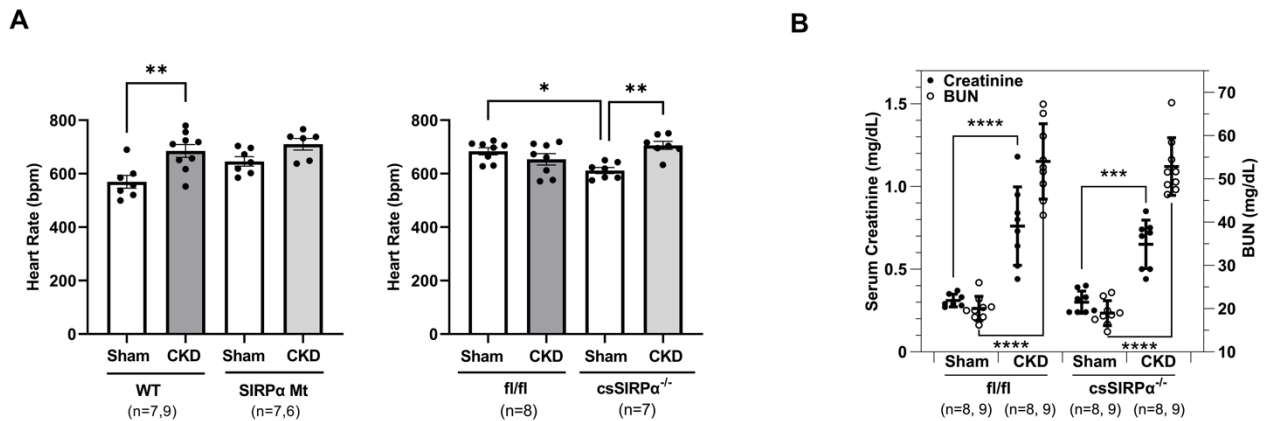

**Figure S2. Heart rate and serum levels of creatinine and blood urea nitrogen (BUN) after CKD.** (A) Heart rate beats per minute (bpm) from WT and SIRP $\alpha$  Mt with or with CKD or SIRP $\alpha^{fl/fl}$  and csSIRP $\alpha^{-/-}$  with or without CKD were determined. (B) Creatinine and BUN were measured at 9-10 weeks after subtotal nephrectomy in sham operated flox (SIRP $\alpha^{fl/fl}$ ) mice and cardiac-specific KO (csSIRP $\alpha^{-/-}$ ) mice with or without CKD. Statistical significance was calculated using one-way ANOVA with Bonferroni's multiple comparisons test (A-B). Values are means  $\pm$  SEM. \**p*<0.05, \*\* *p*<0.01, \*\*\* *p*<0.001, \*\*\*\* *p*<0.0001.

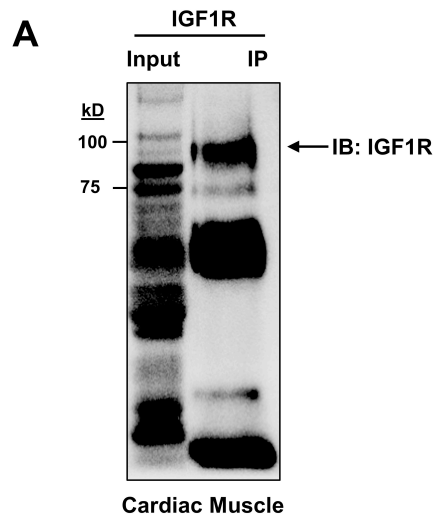

**Figure S3. rSIRP $\alpha$  interacts with myocardial IGF1R.** In heart lysates of flox CKD mice, IGF1R was immunoprecipitated and confirmed by immunoblot.

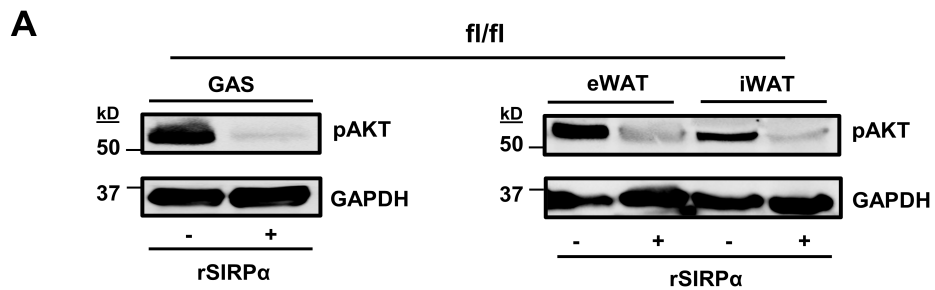

**Figure S4. Exogenous SIRP $\alpha$  suppresses insulin signaling in the skeletal muscle and fat.** Flox (SIRP $\alpha^{f1/f1}$ ) mice were treated with SIRP $\alpha$  recombinant protein (rSIRP $\alpha$ ; 1.2  $\mu$ g/g) by intraperitoneal (i.p.) injection for 2 h. Protein lysates of gastrocnemius (GAS) and adipose tissue (epididymal white adipose tissue, eWAT; inguinal white adipose tissue, iWAT) were immunoblotted to detect pAKT and GAPDH.

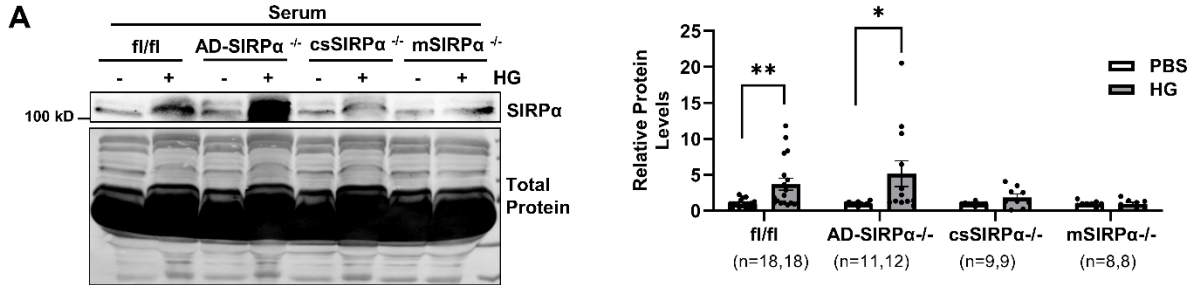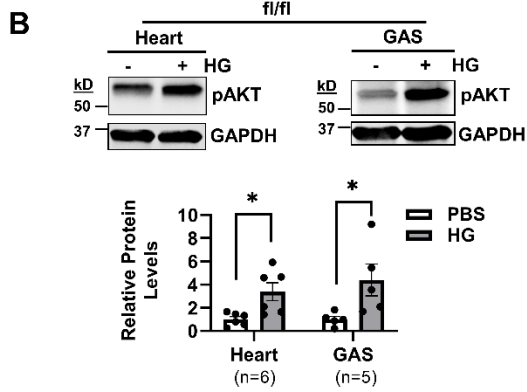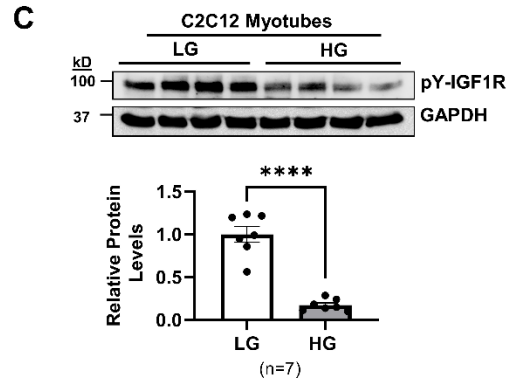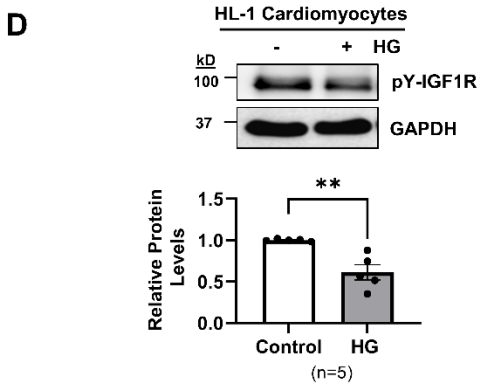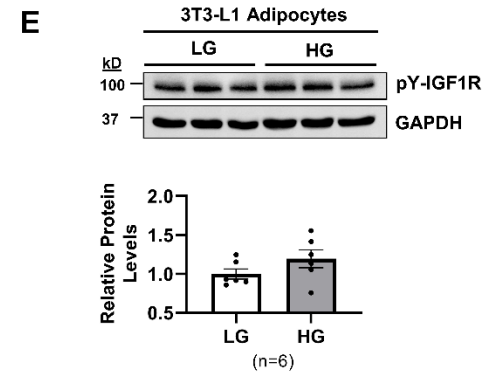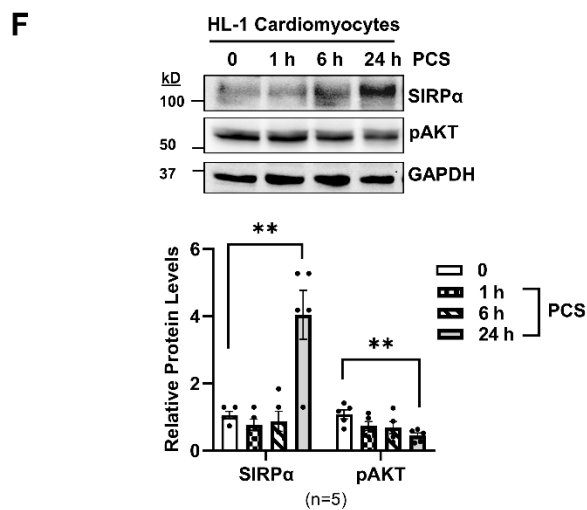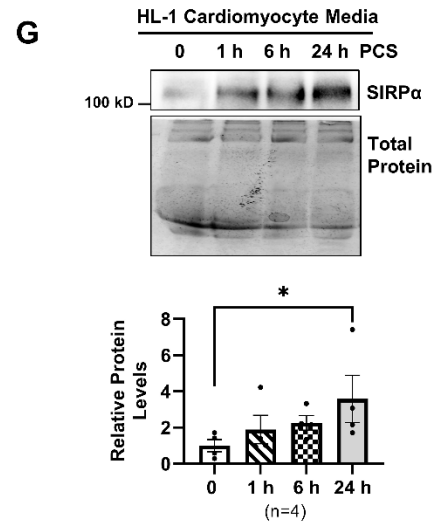

**Figure S5. Hyperglycemia or uremia treatment stimulates SIRP $\alpha$  into circulation and impairs IGF1 receptor signaling.** (A) Mice treated with high glucose (HG; 2 g/kg every 40 minutes  $\times$  3 doses) were compared to PBS treated mice. Serum from flox (SIRP $\alpha^{fl/fl}$ ) and organ specific knockout mice were immunoblotted to detect SIRP $\alpha$  and total protein and representative immunoblots of averaged data are shown (left panel) and relative levels are shown (right panel). (B) Protein lysates of heart and gastrocnemius (GAS) were obtained from PBS control vs. HG treated mice and immunoblotted to detect pAKT and GAPDH and representative immunoblots of averaged data are shown (top panel) with relative densities to GAPDH are shown (bottom panel). (C) C2C12 myotubes were cultured in low glucose (LG, 5 mM) media and treated with HG (25 mM) for 48 h, and cell lysate was immunoblotted to detect pY-IGF1R and GAPDH and representative immunoblots of averaged data are shown (top panel) with relative densities to GAPDH shown (bottom panel). (D) HL-1 cardiomyocytes were cultured in Claycomb media and treated with high glucose (HG, 90 mM) for 48 h. Protein lysates were immunoblotted to detect pY-IGF1R and GAPDH and representative immunoblots of averaged data are shown (top panel) and the relative densities to GAPDH are shown (bottom panel). (E) 3T3-L1 adipocyte were treated with LG media (5 mM) or HG (25 mM) for 48 h. Protein lysates were immunoblotted to detect pY-IGF1R and GAPDH and representative immunoblots of averaged data are shown (top panel) and relative levels are shown (bottom panel). (F) HL-1 cardiomyocytes were treated with PBS control or p-cresol (PCS; 212  $\mu$ M) and cardiomyocytes lysates were immunoblotted with SIRP $\alpha$ , pAKT and GAPDH and representative immunoblots of averaged data are shown (top panel) and relative levels are shown (bottom panel). (G) SIRP $\alpha$  was identified in HL-1 cardiomyocyte cultured media and detected by immunoblot and representative immunoblots of averaged data are shown (top panel) with relative levels to total protein shown (bottom panel); Statistical significance was calculated using unpaired two-tailed Student's *t*-test (A-F) and Mann Whitney test (G). Values are expressed as means  $\pm$  SEM; \**p*<0.05, \*\* *p*<0.01, \*\*\*\* *p*<0.0001.



Supplemental Tables

Table S1: CKD Patient Characteristics

| Age | Gender | Race                     | Calcium (mg/dL) | Phosphorus (mg/dL) | PTH (ng/L) | Fasting Glucose (mg/dL) | Creatinine (mg/dL) | DM  | HTN |
|-----|--------|--------------------------|-----------------|--------------------|------------|-------------------------|--------------------|-----|-----|
| 46  | M      | Caucasian                | 8.6             | 9.6                | 572        | 80                      | 12.8               | no  | no  |
| 65  | F      | Caucasian                | 9               | 3.4                | 319        | 89                      | 8.3                | yes | yes |
| 49  | F      | Caucasian                | 9.3             | 8.7                | 171        | 80                      | 10.5               | no  | yes |
| 40  | M      | Caucasian                | 9.1             | 4.4                | 68         | 82                      | 12.2               | no  | yes |
| 53  | F      | Caucasian                | 9.3             | 7.9                | 228        | 88                      | 9.2                | no  | yes |
| 60  | F      | Caucasian                | 8.5             | 5                  | 1060       | 102                     | 7.1                | no  | yes |
| 30  | F      | African                  | 8.8             | 5.8                | 861        | 90                      | 13.1               | no  | no  |
| 80  | F      | Caucasian                | 8.4             | 2.7                | 173        | 76                      | 8.8                | no  | yes |
| 34  | M      | Caucasian/<br>M. Eastern | 9.6             | 3.3                | 39         | 72                      | 15.4               | no  | no  |
| 59  | M      | Caucasian                | 7.5             | 4.5                | 171        | 75                      | 8.7                | no  | yes |
| 80  | M      | Caucasian                | 8.6             | 2.7                | 146        | 77                      | 6.9                | no  | yes |
| 52  | F      | Caucasian                | 7.6             | 5.1                | 412        | 91                      | 11.1               | no  | yes |
| 34  | F      | Caucasian                | 9.5             | 1.7                | 165        | 79                      | 8.9                | no  | yes |
| 23  | M      | Hispanic                 | 8.8             | 3                  | 299        | 113                     | 19.2               | no  | no  |
| 75  | F      | Caucasian                | 9.5             | 5.9                | 282        | 99                      | 10.2               | no  | yes |
| 57  | F      | Caucasian                | 9.6             | 5.5                | 135        | 86                      | 11                 | no  | yes |
| 77  | M      | Caucasian                | 9.1             | 3.2                | 79         | 77                      | 6.8                | no  | yes |
| 79  | M      | Caucasian                | 8.7             | 5.4                | 250        | 148                     | 7.1                | yes | yes |
| 75  | M      | Caucasian                | 9               | 8.8                | 180        | 90                      | 5.8                | yes | yes |
| 70  | M      | Caucasian                | 8.5             | 5.5                | 250        | 144                     | 9.7                | yes | yes |

Note: PTH: parathyroid hormone; DM: diabetes; HTN: hypertension; M.: Middle

**Table S2: Echocardiographic Analysis in WT and SIRP $\alpha$  Mt**

|                           | WT Sham      | WT CKD        | SIRP $\alpha$ Mt Sham   | SIRP $\alpha$ Mt CKD       |
|---------------------------|--------------|---------------|-------------------------|----------------------------|
| LVAWd (mm)                | 1.16±0.09    | 1.02±0.18     | 1.13±0.06               | 1.054±0.16                 |
| LVAWs (mm)                | 1.63±0.15    | 1.38±0.22     | 1.66±0.14               | 1.60±0.22                  |
| LVIDd (mm)                | 3.62±0.41    | 3.73±0.32     | 4.08±0.20 <sup>#</sup>  | 4.14±0.39                  |
| LVIDs (mm)                | 2.33±0.29    | 2.73±0.45     | 2.45±0.30               | 2.70±0.25                  |
| LVPWd (mm)                | 1.01±0.08    | 0.89±0.13     | 0.98±0.12               | 0.94±0.12                  |
| LVPWs (mm)                | 1.48±0.14    | 1.26±0.23     | 1.66±0.23               | 1.40±0.18                  |
| LV mass/height<br>(mg/mm) | 1.33±0.22    | 1.21±0.22     | 1.53±0.17               | 1.56±0.42                  |
| LV/BW (mg/g)              | 3.38±0.55    | 4.55±0.99*    | 4.28±0.63               | 4.91±1.33                  |
| CO (mL/min)               | 20.15±3.21   | 15.41±2.22*   | 25.31±2.95 <sup>#</sup> | 23.60±5.77 <sup>###</sup>  |
| EF (%)                    | 65.90±5.30   | 53.12±11.30** | 70.65±6.83              | 64.33±5.07 <sup>#</sup>    |
| FS (%)                    | 35.66±4.06   | 27.26±7.64*   | 39.94±5.81              | 34.82±3.68 <sup>#</sup>    |
| HR (bpm)                  | 466.16±13.55 | 462.41±24.59  | 474.26±17.14            | 459.27±25.19               |
| SV ( $\mu$ L)             | 40.31±8.11   | 35.30±4.65    | 52.32±6.16 <sup>#</sup> | 50.76±12.84 <sup>###</sup> |
| RWT (mm)                  | 0.61±0.10    | 0.52±0.12     | 0.52±0.05               | 0.48±0.06                  |
| E/A                       | 2.04±0.84    | 1.24±0.20*    | 1.47±0.35               | 1.52±0.22                  |
| E/e'                      | 41.95±8.71   | 46.17±7.55    | 42.23±13.19             | 47.46±11.46                |
| MPI                       | 1.09±0.32    | 0.90±0.25     | 0.98±0.18               | 0.95±0.22                  |

Note: LVAWd : left ventricular end-diastolic anterior wall thickness; LVAWs: left ventricular end-systolic anterior wall thickness; LVIDd: left ventricular end-diastolic diameter; LVIDs: left ventricular end-systolic diameter; LVPWd: left ventricular end-diastolic posterior wall thickness; LVPWs: left ventricular end-systolic posterior wall thickness; BW: body weight; CO: cardiac output; EF: ejection fraction; FS: fractional shortening; HR: heart rate; SV: stroke volume; RWT: relative wall thickness; E/A: ratio of peak velocity blood flow from left ventricular relaxation in early diastole (the E wave) to peak velocity flow in late diastole caused by atrial contraction (the A wave); E/e': ratio between early mitral inflow velocity and mitral annular early diastolic velocity; MPI: myocardial performance index. Statistical significance was calculated using one-way ANOVA with Tukey's multiple comparisons test. Values are expressed as means  $\pm$  SD; \* p<0.05, \*\*<0.01 Sham vs CKD; #p<0.05, ###p<0.01, ####p<0.001 WT vs SIRP $\alpha$  Mt.

**Table S3: Echocardiographic Analysis in SIRP $\alpha^{fl/fl}$  and csSIRP $\alpha^{-/-}$  with CKD**

|               | SIRP $\alpha^{fl/fl}$ CKD | csSIRP $\alpha^{-/-}$ CKD |
|---------------|---------------------------|---------------------------|
| LVAWd (mm)    | 0.77±0.08                 | 0.80±0.09                 |
| LVAWs (mm)    | 0.96±0.07                 | 1.14±0.23                 |
| LVIDd (mm)    | 4.27±0.35                 | 4.62±0.37                 |
| LVIDs (mm)    | 3.63±0.38                 | 3.65±0.53                 |
| LVPWd (mm)    | 0.75±0.19                 | 0.65±0.13                 |
| LVPWs (mm)    | 0.92±0.22                 | 0.93±0.17                 |
| LV Mass (mg)  | 123.09±23.75              | 137.20±36.91              |
| CO (mL/min)   | 11.27±2.46                | 21.19±4.01***             |
| EF (%)        | 32.63±5.27                | 45.12±9.52*               |
| FS (%)        | 15.33±2.69                | 24.30±6.77*               |
| HR (bpm)      | 423.17±46.77              | 467.66±39.32              |
| SV ( $\mu$ L) | 26.44±3.81                | 45.06±5.14****            |

Note: LVAWd : left ventricular end-diastolic anterior wall thickness; LVAWs: left ventricular end-systolic anterior wall thickness; LVIDd: left ventricular end-diastolic diameter; LVIDs: left ventricular end-systolic diameter; LVPWd: left ventricular end-diastolic posterior wall thickness; LVPWs: left ventricular end-systolic posterior wall thickness; CO: cardiac output; EF: ejection fraction; FS: fractional shortening; HR: heart rate; SV: stroke volume; Statistical significance was calculated using unpaired two-tailed Student's *t*-test. Values are expressed as means  $\pm$  SD; \*P<0.05, \*\*\* p<0.001, \*\*\*\* p<0.0001 SIRP $\alpha^{fl/fl}$  CKD vs. csSIRP $\alpha^{-/-}$  CKD.

**Table S4: Bio-layer Interferometry Analysis**

| KD ( $\mu$ M) | KD Error | ka (1/Ms) | ka Error | kdis (1/s) | kdis Error | Full X <sup>2</sup> | Full R <sup>2</sup> |
|---------------|----------|-----------|----------|------------|------------|---------------------|---------------------|
| 147           | 4.58E-05 | 3.02E+01  | 9.40E+00 | 4.43E-03   | 2.09E-05   | 0.6691              | 0.9522              |

Note: Kinetic results for the interaction between Fc-containing ligand SIRP $\alpha$  and anti-mouse IGF-1R IP protein using bio-layer interferometry, Octet RED384 platform. The kinetic results of association rate constant (ka) and dissociation rate constant (kdis) and affinity (equilibrium dissociation, KD) were highly comparable.

**Statistical Table**

| <b>Figure</b>                                  | <b>Parametric Analysis Type</b> | <b>p Value</b> |
|------------------------------------------------|---------------------------------|----------------|
| <b>1A</b>                                      |                                 |                |
| BUN                                            |                                 |                |
| WT Sham vs. WT CKD                             | one-way ANOVA with Bonferroni's | 0.00000004     |
| WT Sham vs. SIRP $\alpha$ Mt Sham              | one-way ANOVA with Bonferroni's | >0.9999        |
| SIRP $\alpha$ Mt Sham vs. SIRP $\alpha$ Mt CKD | one-way ANOVA with Bonferroni's | 0.00000012     |
| WT CKD vs. SIRP $\alpha$ Mt CKD                | one-way ANOVA with Bonferroni's | >0.9999        |
| Creatinine                                     |                                 |                |
| WT Sham vs. WT CKD                             | one-way ANOVA with Bonferroni's | 0.0037         |
| SIRP $\alpha$ Mt Sham vs. SIRP $\alpha$ Mt CKD | one-way ANOVA with Bonferroni's | 0.0089         |
| WT Sham vs. SIRP $\alpha$ Mt Sham              | one-way ANOVA with Bonferroni's | >0.9999        |
| WT CKD vs. SIRP $\alpha$ Mt CKD                | one-way ANOVA with Bonferroni's | >0.9999        |
| <b>1B</b>                                      | unpaired two-tailed t test      | 0.0016         |
| <b>1D</b>                                      | unpaired two-tailed t test      | 0.0074         |
| <b>1E</b>                                      | unpaired two-tailed t test      | 0.0001         |
| <b>2B</b>                                      |                                 |                |
| WT Sham vs. WT CKD                             | one-way ANOVA with Bonferroni's | 0.0052         |
| WT CKD vs. SIRP $\alpha$ Mt CKD                | one-way ANOVA with Bonferroni's | 0.0164         |
| SIRP $\alpha$ Mt Sham vs. SIRP $\alpha$ Mt CKD | one-way ANOVA with Bonferroni's | 0.3587         |
| WT Sham vs. SIRP $\alpha$ Mt Sham              | one-way ANOVA with Bonferroni's | 0.7912         |
| <b>2C</b>                                      |                                 |                |
| WT Sham vs. WT CKD                             | one-way ANOVA with Bonferroni's | 0.0135         |
| WT Sham vs. SIRP $\alpha$ Mt Sham              | one-way ANOVA with Bonferroni's | 0.4598         |
| WT CKD vs. SIRP $\alpha$ Mt CKD                | one-way ANOVA with Bonferroni's | 0.03           |
| SIRP $\alpha$ Mt Sham vs. SIRP $\alpha$ Mt CKD | one-way ANOVA with Bonferroni's | 0.2477         |
| <b>2D</b>                                      |                                 |                |
| WT Sham vs. WT CKD                             | one-way ANOVA with Bonferroni's | 0.0176         |
| WT Sham vs. SIRP $\alpha$ Mt Sham              | one-way ANOVA with Bonferroni's | 0.0116         |
| SIRP $\alpha$ Mt Sham vs. SIRP $\alpha$ Mt CKD | one-way ANOVA with Bonferroni's | >0.9999        |
| WT CKD vs. SIRP $\alpha$ Mt CKD                | one-way ANOVA with Bonferroni's | 0.000046       |
| <b>2F</b>                                      | unpaired two-tailed t test      | 0.0226         |
| <b>2G</b>                                      | unpaired two-tailed t test      | 0.0221         |
| <b>2H</b>                                      | unpaired two-tailed t test      | 0.0008         |
| <b>3A</b>                                      |                                 |                |
| WT Sham vs. WT CKD                             | one-way ANOVA with Bonferroni's | 0.026          |
| WT Sham vs. SIRP $\alpha$ Mt Sham              | one-way ANOVA with Bonferroni's | 0.0001         |
| SIRP $\alpha$ Mt Sham vs. SIRP $\alpha$ Mt CKD | one-way ANOVA with Bonferroni's | 0.0923         |
| WT CKD vs. SIRP $\alpha$ Mt CKD                | one-way ANOVA with Bonferroni's | 0.0005         |
| <b>3B</b>                                      |                                 |                |
| WT Sham vs. WT CKD                             | one-way ANOVA with Bonferroni's | 0.0022         |
| WT Sham vs. SIRP $\alpha$ Mt Sham              | one-way ANOVA with Bonferroni's | 0.0028         |
| WT CKD vs. SIRP $\alpha$ Mt CKD                | one-way ANOVA with Bonferroni's | 0.2525         |
| SIRP $\alpha$ Mt Sham vs. SIRP $\alpha$ Mt CKD | one-way ANOVA with Bonferroni's | 0.2055         |
| <b>3C (top panel)</b>                          |                                 |                |
| WT Sham vs. WT CKD                             | one-way ANOVA with Bonferroni's | 0.0005         |
| WT Sham vs. SIRP $\alpha$ Mt Sham              | one-way ANOVA with Bonferroni's | 0.4537         |
| WT CKD vs. SIRP $\alpha$ Mt CKD                | one-way ANOVA with Bonferroni's | 0.00000058     |
| SIRP $\alpha$ Mt Sham vs. SIRP $\alpha$ Mt CKD | one-way ANOVA with Bonferroni's | >0.9999        |
| <b>3C (bottom panel)</b>                       |                                 |                |

|                                                  |                                 |         |
|--------------------------------------------------|---------------------------------|---------|
| fl/fl Sham vs. fl/fl CKD                         | one-way ANOVA with Bonferroni's | 0.0019  |
| fl/fl Sham vs. csSIRP $\alpha^+$ Sham            | one-way ANOVA with Bonferroni's | >0.9999 |
| csSIRP $\alpha^+$ Sham vs. csSIRP $\alpha^+$ CKD | one-way ANOVA with Bonferroni's | 0.0416  |
| fl/fl CKD vs. csSIRP $\alpha^+$ CKD              | one-way ANOVA with Bonferroni's | 0.3345  |
| <b>3D</b>                                        |                                 |         |
| fl/fl Sham vs. fl/fl CKD                         | one-way ANOVA with Bonferroni's | 0.0122  |
| fl/fl CKD vs. csSIRP $\alpha^+$ CKD              | one-way ANOVA with Bonferroni's | 0.0025  |
| fl/fl CKD vs. mSIRP $\alpha^+$ CKD               | one-way ANOVA with Bonferroni's | 0.0375  |
| csSIRP $\alpha^+$ Sham vs. csSIRP $\alpha^+$ CKD | one-way ANOVA with Bonferroni's | >0.9999 |
| mSIRP $\alpha^+$ Sham vs. mSIRP $\alpha^+$ CKD   | one-way ANOVA with Bonferroni's | >0.9999 |
| <b>3E</b>                                        |                                 |         |
| ACC1                                             |                                 |         |
| WT Sham vs. WT CKD                               | one-way ANOVA with Bonferroni's | 0.0003  |
| WT Sham vs. SIRP $\alpha$ Mt Sham                | one-way ANOVA with Bonferroni's | 0.827   |
| WT CKD vs. SIRP $\alpha$ Mt CKD                  | one-way ANOVA with Bonferroni's | 0.3814  |
| SIRP $\alpha$ Mt Sham vs. SIRP $\alpha$ Mt CKD   | one-way ANOVA with Bonferroni's | 0.4179  |
| ANP                                              |                                 |         |
| WT Sham vs. WT CKD                               | one-way ANOVA with Bonferroni's | 0.0318  |
| WT Sham vs. SIRP $\alpha$ Mt Sham                | one-way ANOVA with Bonferroni's | 0.0023  |
| WT CKD vs. SIRP $\alpha$ Mt CKD                  | one-way ANOVA with Bonferroni's | 0.1028  |
| SIRP $\alpha$ Mt Sham vs. SIRP $\alpha$ Mt CKD   | one-way ANOVA with Bonferroni's | 0.5707  |
| BNP                                              |                                 |         |
| WT Sham vs. WT CKD                               | one-way ANOVA with Bonferroni's | 0.0023  |
| WT Sham vs. SIRP $\alpha$ Mt Sham                | one-way ANOVA with Bonferroni's | 0.6044  |
| WT CKD vs. SIRP $\alpha$ Mt CKD                  | one-way ANOVA with Bonferroni's | 0.2527  |
| SIRP $\alpha$ Mt Sham vs. SIRP $\alpha$ Mt CKD   | one-way ANOVA with Bonferroni's | >0.9999 |
| CPT1b                                            |                                 |         |
| WT Sham vs. WT CKD                               | one-way ANOVA with Bonferroni's | 0.0011  |
| WT Sham vs. SIRP $\alpha$ Mt Sham                | one-way ANOVA with Bonferroni's | 0.0064  |
| WT CKD vs. SIRP $\alpha$ Mt CKD                  | one-way ANOVA with Bonferroni's | >0.9999 |
| SIRP $\alpha$ Mt Sham vs. SIRP $\alpha$ Mt CKD   | one-way ANOVA with Bonferroni's | >0.9999 |
| GLUT1                                            |                                 |         |
| WT Sham vs. WT CKD                               | one-way ANOVA with Bonferroni's | 0.0007  |
| WT Sham vs. SIRP $\alpha$ Mt Sham                | one-way ANOVA with Bonferroni's | 0.0346  |
| WT CKD vs. SIRP $\alpha$ Mt CKD                  | one-way ANOVA with Bonferroni's | 0.0739  |
| SIRP $\alpha$ Mt Sham vs. SIRP $\alpha$ Mt CKD   | one-way ANOVA with Bonferroni's | >0.9999 |
| GLUT4                                            |                                 |         |
| WT Sham vs. WT CKD                               | one-way ANOVA with Bonferroni's | 0.0005  |
| WT Sham vs. SIRP $\alpha$ Mt Sham                | one-way ANOVA with Bonferroni's | 0.0065  |
| WT CKD vs. SIRP $\alpha$ Mt CKD                  | one-way ANOVA with Bonferroni's | 0.313   |
| SIRP $\alpha$ Mt Sham vs. SIRP $\alpha$ Mt CKD   | one-way ANOVA with Bonferroni's | >0.9999 |
| MHC $\alpha$                                     |                                 |         |
| WT Sham vs. WT CKD                               | one-way ANOVA with Bonferroni's | 0.0014  |
| WT Sham vs. SIRP $\alpha$ Mt Sham                | one-way ANOVA with Bonferroni's | 0.0057  |
| WT CKD vs. SIRP $\alpha$ Mt CKD                  | one-way ANOVA with Bonferroni's | >0.9999 |
| SIRP $\alpha$ Mt Sham vs. SIRP $\alpha$ Mt CKD   | one-way ANOVA with Bonferroni's | >0.9999 |
| MHC $\beta$                                      |                                 |         |
| WT Sham vs. WT CKD                               | one-way ANOVA with Bonferroni's | 0.0015  |
| WT Sham vs. SIRP $\alpha$ Mt Sham                | one-way ANOVA with Bonferroni's | 0.0816  |
| WT CKD vs. SIRP $\alpha$ Mt CKD                  | one-way ANOVA with Bonferroni's | >0.9999 |

|                                                        |                                 |          |
|--------------------------------------------------------|---------------------------------|----------|
| SIRP $\alpha$ Mt Sham vs. SIRP $\alpha$ Mt CKD         | one-way ANOVA with Bonferroni's | >0.9999  |
| PGC1a                                                  |                                 |          |
| WT Sham vs. WT CKD                                     | one-way ANOVA with Bonferroni's | 0.000071 |
| WT Sham vs. SIRP $\alpha$ Mt Sham                      | one-way ANOVA with Bonferroni's | 0.3809   |
| WT CKD vs. SIRP $\alpha$ Mt CKD                        | one-way ANOVA with Bonferroni's | 0.0222   |
| SIRP $\alpha$ Mt Sham vs. SIRP $\alpha$ Mt CKD         | one-way ANOVA with Bonferroni's | >0.9999  |
| PPAR $\alpha$                                          |                                 |          |
| WT Sham vs. WT CKD                                     | one-way ANOVA with Bonferroni's | 0.000019 |
| WT Sham vs. SIRP $\alpha$ Mt Sham                      | one-way ANOVA with Bonferroni's | 0.0186   |
| WT CKD vs. SIRP $\alpha$ Mt CKD                        | one-way ANOVA with Bonferroni's | >0.9999  |
| SIRP $\alpha$ Mt Sham vs. SIRP $\alpha$ Mt CKD         | one-way ANOVA with Bonferroni's | 0.4532   |
| UCP3                                                   |                                 |          |
| WT Sham vs. WT CKD                                     | one-way ANOVA with Bonferroni's | >0.9999  |
| WT Sham vs. SIRP $\alpha$ Mt Sham                      | one-way ANOVA with Bonferroni's | 0.0035   |
| WT CKD vs. SIRP $\alpha$ Mt CKD                        | one-way ANOVA with Bonferroni's | 0.4771   |
| SIRP $\alpha$ Mt Sham vs. SIRP $\alpha$ Mt CKD         | one-way ANOVA with Bonferroni's | 0.0494   |
| <b>3F</b>                                              |                                 |          |
| ACC1                                                   |                                 |          |
| fl/fl Sham vs. fl/fl CKD                               | one-way ANOVA with Bonferroni's | 0.0158   |
| fl/fl Sham vs. mSIRP $\alpha^{\pm}$ Sham               | one-way ANOVA with Bonferroni's | >0.9999  |
| mSIRP $\alpha^{\pm}$ Sham vs. mSIRP $\alpha^{\pm}$ CKD | one-way ANOVA with Bonferroni's | >0.9999  |
| fl/fl CKD vs. mSIRP $\alpha^{\pm}$ CKD                 | one-way ANOVA with Bonferroni's | 0.1932   |
| ANP                                                    |                                 |          |
| fl/fl Sham vs. fl/fl CKD                               | one-way ANOVA with Bonferroni's | 0.0001   |
| fl/fl Sham vs. mSIRP $\alpha^{\pm}$ Sham               | one-way ANOVA with Bonferroni's | 0.0012   |
| mSIRP $\alpha^{\pm}$ Sham vs. mSIRP $\alpha^{\pm}$ CKD | one-way ANOVA with Bonferroni's | 0.0781   |
| fl/fl CKD vs. mSIRP $\alpha^{\pm}$ CKD                 | one-way ANOVA with Bonferroni's | 0.0093   |
| BNP                                                    |                                 |          |
| fl/fl Sham vs. fl/fl CKD                               | one-way ANOVA with Bonferroni's | 0.0009   |
| fl/fl Sham vs. mSIRP $\alpha^{\pm}$ Sham               | one-way ANOVA with Bonferroni's | >0.9999  |
| mSIRP $\alpha^{\pm}$ Sham vs. mSIRP $\alpha^{\pm}$ CKD | one-way ANOVA with Bonferroni's | 0.0186   |
| fl/fl CKD vs. mSIRP $\alpha^{\pm}$ CKD                 | one-way ANOVA with Bonferroni's | 0.9595   |
| CPT1b                                                  |                                 |          |
| fl/fl Sham vs. fl/fl CKD                               | one-way ANOVA with Bonferroni's | 0.0249   |
| fl/fl Sham vs. mSIRP $\alpha^{\pm}$ Sham               | one-way ANOVA with Bonferroni's | >0.9999  |
| mSIRP $\alpha^{\pm}$ Sham vs. mSIRP $\alpha^{\pm}$ CKD | one-way ANOVA with Bonferroni's | >0.9999  |
| fl/fl CKD vs. mSIRP $\alpha^{\pm}$ CKD                 | one-way ANOVA with Bonferroni's | 0.0691   |
| GLUT1                                                  |                                 |          |
| fl/fl Sham vs. fl/fl CKD                               | one-way ANOVA with Bonferroni's | 0.00096  |
| fl/fl Sham vs. mSIRP $\alpha^{\pm}$ Sham               | one-way ANOVA with Bonferroni's | >0.9999  |
| mSIRP $\alpha^{\pm}$ Sham vs. mSIRP $\alpha^{\pm}$ CKD | one-way ANOVA with Bonferroni's | >0.9999  |
| fl/fl CKD vs. mSIRP $\alpha^{\pm}$ CKD                 | one-way ANOVA with Bonferroni's | 0.0666   |
| GLUT4                                                  |                                 |          |
| fl/fl Sham vs. fl/fl CKD                               | one-way ANOVA with Bonferroni's | 0.0033   |
| fl/fl Sham vs. mSIRP $\alpha^{\pm}$ Sham               | one-way ANOVA with Bonferroni's | >0.9999  |
| mSIRP $\alpha^{\pm}$ Sham vs. mSIRP $\alpha^{\pm}$ CKD | one-way ANOVA with Bonferroni's | 0.2073   |
| fl/fl CKD vs. mSIRP $\alpha^{\pm}$ CKD                 | one-way ANOVA with Bonferroni's | >0.9999  |
| MHC $\alpha$                                           |                                 |          |
| fl/fl Sham vs. fl/fl CKD                               | one-way ANOVA with Bonferroni's | 0.0119   |
| fl/fl Sham vs. mSIRP $\alpha^{\pm}$ Sham               | one-way ANOVA with Bonferroni's | 0.3411   |
| mSIRP $\alpha^{\pm}$ Sham vs. mSIRP $\alpha^{\pm}$ CKD | one-way ANOVA with Bonferroni's | >0.9999  |

|                                                     |                                 |          |
|-----------------------------------------------------|---------------------------------|----------|
| fl/fl CKD vs. mSIRP $\alpha^+$ CKD<br>MHC $\beta$   | one-way ANOVA with Bonferroni's | 0.3315   |
| fl/fl Sham vs. fl/fl CKD                            | one-way ANOVA with Bonferroni's | 0.0005   |
| fl/fl Sham vs. mSIRP $\alpha^+$ Sham                | one-way ANOVA with Bonferroni's | 0.2019   |
| mSIRP $\alpha^+$ Sham vs. mSIRP $\alpha^+$ CKD      | one-way ANOVA with Bonferroni's | 0.8851   |
| fl/fl CKD vs. mSIRP $\alpha^+$ CKD<br>PGC1 $\alpha$ | one-way ANOVA with Bonferroni's | 0.0049   |
| fl/fl Sham vs. fl/fl CKD                            | one-way ANOVA with Bonferroni's | 0.0022   |
| fl/fl Sham vs. mSIRP $\alpha^+$ Sham                | one-way ANOVA with Bonferroni's | >0.9999  |
| mSIRP $\alpha^+$ Sham vs. mSIRP $\alpha^+$ CKD      | one-way ANOVA with Bonferroni's | >0.9999  |
| fl/fl CKD vs. mSIRP $\alpha^+$ CKD<br>PPAR $\alpha$ | one-way ANOVA with Bonferroni's | 0.0021   |
| fl/fl Sham vs. fl/fl CKD                            | one-way ANOVA with Bonferroni's | 0.0149   |
| fl/fl Sham vs. mSIRP $\alpha^+$ Sham                | one-way ANOVA with Bonferroni's | >0.9999  |
| mSIRP $\alpha^+$ Sham vs. mSIRP $\alpha^+$ CKD      | one-way ANOVA with Bonferroni's | >0.9999  |
| fl/fl CKD vs. mSIRP $\alpha^+$ CKD<br>UCP3          | one-way ANOVA with Bonferroni's | 0.1394   |
| fl/fl Sham vs. fl/fl CKD                            | one-way ANOVA with Bonferroni's | 0.0283   |
| fl/fl Sham vs. mSIRP $\alpha^+$ Sham                | one-way ANOVA with Bonferroni's | 0.061    |
| mSIRP $\alpha^+$ Sham vs. mSIRP $\alpha^+$ CKD      | one-way ANOVA with Bonferroni's | 0.0001   |
| fl/fl CKD vs. mSIRP $\alpha^+$ CKD                  | one-way ANOVA with Bonferroni's | >0.9999  |
| <b>3G</b>                                           |                                 |          |
| csSIRP $\alpha^+$ Sham vs. csSIRP $\alpha^+$ CKD    |                                 |          |
| ACC1                                                | unpaired two-tailed t test      | 0.4517   |
| ANP                                                 | unpaired two-tailed t test      | 0.089    |
| BNP                                                 | unpaired two-tailed t test      | 0.9589   |
| CPT1b                                               | unpaired two-tailed t test      | 0.2666   |
| GLUT1                                               | unpaired two-tailed t test      | 0.1405   |
| GLUT4                                               | unpaired two-tailed t test      | 0.2261   |
| MHC $\alpha$                                        | unpaired two-tailed t test      | 0.1899   |
| MHC $\beta$                                         | unpaired two-tailed t test      | 0.078    |
| PGC1 $\alpha$                                       | unpaired two-tailed t test      | 0.6005   |
| PPAR $\alpha$                                       | unpaired two-tailed t test      | 1.02     |
| UCP3                                                | unpaired two-tailed t test      | 0.9244   |
| <b>4A</b>                                           |                                 |          |
| WT Sham vs. WT CKD                                  | one-way ANOVA with Bonferroni's | 0.000022 |
| WT Sham vs. SIRP $\alpha$ Mt Sham                   | one-way ANOVA with Bonferroni's | >0.9999  |
| SIRP $\alpha$ Mt Sham vs. SIRP $\alpha$ Mt CKD      | one-way ANOVA with Bonferroni's | >0.9999  |
| WT CKD vs. SIRP $\alpha$ Mt CKD                     | one-way ANOVA with Bonferroni's | 0.000007 |
| <b>4B</b>                                           |                                 |          |
| $\alpha$ SMA                                        |                                 |          |
| WT Sham vs. WT CKD                                  | one-way ANOVA with Bonferroni's | 0.0084   |
| WT Sham vs. SIRP $\alpha$ Mt Sham                   | one-way ANOVA with Bonferroni's | >0.9999  |
| SIRP $\alpha$ Mt Sham vs. SIRP $\alpha$ Mt CKD      | one-way ANOVA with Bonferroni's | >0.9999  |
| WT CKD vs. SIRP $\alpha$ Mt CKD                     | one-way ANOVA with Bonferroni's | 0.1455   |
| Fibronectin                                         |                                 |          |
| WT Sham vs. WT CKD                                  | one-way ANOVA with Bonferroni's | 0.0493   |
| WT Sham vs. SIRP $\alpha$ Mt Sham                   | one-way ANOVA with Bonferroni's | 0.0014   |
| SIRP $\alpha$ Mt Sham vs. SIRP $\alpha$ Mt CKD      | one-way ANOVA with Bonferroni's | 0.9935   |
| WT CKD vs. SIRP $\alpha$ Mt CKD                     | one-way ANOVA with Bonferroni's | >0.9999  |

|                                                                        |                                 |            |
|------------------------------------------------------------------------|---------------------------------|------------|
| <b>pAKT</b>                                                            |                                 |            |
| WT Sham vs. WT CKD                                                     | one-way ANOVA with Bonferroni's | 0.0054     |
| WT Sham vs. SIRP $\alpha$ Mt Sham                                      | one-way ANOVA with Bonferroni's | 0.1348     |
| SIRP $\alpha$ Mt Sham vs. SIRP $\alpha$ Mt CKD                         | one-way ANOVA with Bonferroni's | 0.9175     |
| WT CKD vs. SIRP $\alpha$ Mt CKD                                        | one-way ANOVA with Bonferroni's | 0.0657     |
| <b>PI3K</b>                                                            |                                 |            |
| WT Sham vs. WT CKD                                                     | one-way ANOVA with Bonferroni's | 0.0117     |
| WT Sham vs. SIRP $\alpha$ Mt Sham                                      | one-way ANOVA with Bonferroni's | 0.0683     |
| SIRP $\alpha$ Mt Sham vs. SIRP $\alpha$ Mt CKD                         | one-way ANOVA with Bonferroni's | >0.9999    |
| WT CKD vs. SIRP $\alpha$ Mt CKD                                        | one-way ANOVA with Bonferroni's | >0.9999    |
| <b>4C</b>                                                              |                                 |            |
| <b><math>\alpha</math>SMA</b>                                          |                                 |            |
| fl/fl Sham vs. fl/fl CKD                                               | one-way ANOVA with Bonferroni's | 0.0027     |
| fl/fl Sham vs. mSIRP $\alpha^{\Delta}$ Sham                            | one-way ANOVA with Bonferroni's | >0.9999    |
| mSIRP $\alpha^{\Delta}$ Sham vs. mSIRP $\alpha^{\Delta}$ CKD           | one-way ANOVA with Bonferroni's | 0.1098     |
| fl/fl CKD vs. mSIRP $\alpha^{\Delta}$ CKD                              | one-way ANOVA with Bonferroni's | >0.9999    |
| <b>Fibronectin</b>                                                     |                                 |            |
| fl/fl Sham vs. fl/fl CKD                                               | one-way ANOVA with Bonferroni's | 0.0196     |
| fl/fl Sham vs. mSIRP $\alpha^{\Delta}$ Sham                            | one-way ANOVA with Bonferroni's | >0.9999    |
| mSIRP $\alpha^{\Delta}$ Sham vs. mSIRP $\alpha^{\Delta}$ CKD           | one-way ANOVA with Bonferroni's | >0.9999    |
| fl/fl CKD vs. mSIRP $\alpha^{\Delta}$ CKD                              | one-way ANOVA with Bonferroni's | 0.1191     |
| <b>pAKT</b>                                                            |                                 |            |
| fl/fl Sham vs. fl/fl CKD                                               | one-way ANOVA with Bonferroni's | >0.9999    |
| fl/fl Sham vs. mSIRP $\alpha^{\Delta}$ Sham                            | one-way ANOVA with Bonferroni's | >0.9999    |
| mSIRP $\alpha^{\Delta}$ Sham vs. mSIRP $\alpha^{\Delta}$ CKD           | one-way ANOVA with Bonferroni's | >0.9999    |
| fl/fl CKD vs. mSIRP $\alpha^{\Delta}$ CKD                              | one-way ANOVA with Bonferroni's | 0.8564     |
| <b>PI3K</b>                                                            |                                 |            |
| fl/fl Sham vs. fl/fl CKD                                               | one-way ANOVA with Bonferroni's | 0.0171     |
| fl/fl Sham vs. mSIRP $\alpha^{\Delta}$ Sham                            | one-way ANOVA with Bonferroni's | >0.9999    |
| mSIRP $\alpha^{\Delta}$ Sham vs. mSIRP $\alpha^{\Delta}$ CKD           | one-way ANOVA with Bonferroni's | 0.0859     |
| fl/fl CKD vs. mSIRP $\alpha^{\Delta}$ CKD                              | one-way ANOVA with Bonferroni's | >0.9999    |
| <b>4D</b>                                                              |                                 |            |
| csSIRP $\alpha^{\Delta}$ Sham vs. csSIRP $\alpha^{\Delta}$ CKD         |                                 |            |
| <b><math>\alpha</math>SMA</b>                                          |                                 |            |
| fibronectin                                                            | unpaired two-tailed t test      | 0.4162     |
| <b>pAKT</b>                                                            |                                 |            |
| PI3K                                                                   | unpaired two-tailed t test      | 0.0919     |
| <b>5A</b>                                                              |                                 |            |
| fl/fl Sham vs. fl/fl CKD                                               | one-way ANOVA with Bonferroni's | 0.0004     |
| fl/fl Sham vs. mSIRP $\alpha^{\Delta}$ Sham                            | one-way ANOVA with Bonferroni's | >0.9999    |
| mSIRP $\alpha^{\Delta}$ Sham vs. mSIRP $\alpha^{\Delta}$ CKD           | one-way ANOVA with Bonferroni's | >0.9999    |
| fl/fl CKD vs. mSIRP $\alpha^{\Delta}$ CKD                              | one-way ANOVA with Bonferroni's | 0.0056     |
| <b>6A</b>                                                              |                                 |            |
| <b>pAKT/AKT</b>                                                        |                                 |            |
| fl/fl PBS vs. fl/fl rSIRP $\alpha$                                     | unpaired two-tailed t test      | 0.00000003 |
| mSIRP $\alpha^{\Delta}$ PBS vs. mSIRP $\alpha^{\Delta}$ rSIRP $\alpha$ | unpaired two-tailed t test      | 0.0203     |
| <b>pY-IGF1R/IGF1R</b>                                                  |                                 |            |
| fl/fl PBS vs. fl/fl rSIRP $\alpha$                                     | unpaired two-tailed t test      | 0.0006     |
| mSIRP $\alpha^{\Delta}$ PBS vs. mSIRP $\alpha^{\Delta}$ rSIRP $\alpha$ | unpaired two-tailed t test      | 0.0218     |
| <b>6B</b>                                                              |                                 |            |
| pAKT 15min vs. 0                                                       | unpaired two-tailed t test      | 0.2634     |



|                                                  |                                 |          |
|--------------------------------------------------|---------------------------------|----------|
| pAKT 30 min vs. 0                                | unpaired two-tailed t test      | 0.8675   |
| pAKT 1 h vs. 0                                   | unpaired two-tailed t test      | 0.1197   |
| pAKT 6 h vs. 0                                   | unpaired two-tailed t test      | 0.0013   |
| pAKT 24 h vs. 0                                  | unpaired two-tailed t test      | 0.0371   |
| pY-IGF1R 15 min vs. 0                            | unpaired two-tailed t test      | 0.0006   |
| pY-IGF1R 30 min vs. 0                            | unpaired two-tailed t test      | 0.0003   |
| pY-IGF1R 1 h vs. 0                               | unpaired two-tailed t test      | 0.0001   |
| pY-IGF1R 6 h vs. 0                               | unpaired two-tailed t test      | 0.0067   |
| pY-IGF1R 24 h vs. 0                              | unpaired two-tailed t test      | 0.0765   |
| Fibronectin 15 min vs. 0                         | unpaired two-tailed t test      | 0.0752   |
| Fibronectin 30 min vs. 0                         | unpaired two-tailed t test      | 0.0411   |
| Fibronectin 1 h vs. 0                            | unpaired two-tailed t test      | 0.0294   |
| Fibronectin 6 h vs. 0                            | unpaired two-tailed t test      | 0.0053   |
| Fibronectin 24 h vs. 0                           | unpaired two-tailed t test      | 0.0014   |
| <b>6C</b>                                        |                                 |          |
| SIRP $\alpha$                                    | unpaired two-tailed t test      | 0.000074 |
| pAKT/AKT                                         | unpaired two-tailed t test      | 0.0004   |
| pY-IGF1R/IGF1R                                   | unpaired two-tailed t test      | 0.0004   |
| <b>6D</b>                                        |                                 |          |
| SIRP $\alpha$                                    | unpaired two-tailed t test      | 0.0275   |
| pAKT/AKT                                         | unpaired two-tailed t test      | 0.0057   |
| pY-IGF1R/IGF1R                                   | unpaired two-tailed t test      | 0.0181   |
| <b>7A</b>                                        |                                 |          |
| <b>7B</b>                                        |                                 |          |
| <b>7C</b>                                        |                                 |          |
| 0 vs. 1 h HG                                     | unpaired two-tailed t test      | 0.3049   |
| 0 vs. 6 h HG                                     | unpaired two-tailed t test      | 0.2716   |
| 0 vs. 24 h HG                                    | unpaired two-tailed t test      | 0.0178   |
| <b>7D</b>                                        |                                 |          |
| 0 vs. 1 h HG                                     | unpaired two-tailed t test      | 0.0643   |
| 0 vs. 6 h HG                                     | unpaired two-tailed t test      | 0.0775   |
| 0 vs. 24 h HG                                    | unpaired two-tailed t test      | 0.0019   |
| <b>7E</b>                                        |                                 |          |
| <b>S1A</b>                                       |                                 |          |
| SIRP $\alpha$                                    | unpaired two-tailed t test      | 0.0476   |
| ANP                                              | unpaired two-tailed t test      | 0.0865   |
| BNP                                              | unpaired two-tailed t test      | 0.0637   |
| UCP3                                             | unpaired two-tailed t test      | 0.808    |
| <b>S1B</b>                                       |                                 |          |
| PI3K                                             | unpaired two-tailed t test      | 0.0123   |
| pAKT                                             | unpaired two-tailed t test      | 0.0184   |
| GLUT4                                            | unpaired two-tailed t test      | 0.0483   |
| <b>S2A (left panel)</b>                          |                                 |          |
| WT Sham vs. WT CKD                               | one-way ANOVA with Bonferroni's | 0.0037   |
| WT CKD vs. SIRP $\alpha$ Mt CKD                  | one-way ANOVA with Bonferroni's | >0.9999  |
| SIRP $\alpha$ Mt Sham vs. SIRP $\alpha$ Mt CKD   | one-way ANOVA with Bonferroni's | 0.2791   |
| WT Sham vs. SIRP $\alpha$ Mt Sham                | one-way ANOVA with Bonferroni's | 0.1114   |
| <b>S2A (right panel)</b>                         |                                 |          |
| fl/fl Sham vs. fl/fl CKD                         | one-way ANOVA with Bonferroni's | 0.7362   |
| fl/fl Sham vs. csSIRP $\alpha^+$ Sham            | one-way ANOVA with Bonferroni's | 0.0154   |
| csSIRP $\alpha^+$ Sham vs. csSIRP $\alpha^+$ CKD | one-way ANOVA with Bonferroni's | 0.0018   |

|                                                  |                                 |          |
|--------------------------------------------------|---------------------------------|----------|
| fl/fl CKD vs. csSIRP $\alpha^+$ CKD              | one-way ANOVA with Bonferroni's | 0.1223   |
| <b>S2B</b>                                       |                                 |          |
| BUN                                              |                                 |          |
| fl/fl Sham vs. fl/fl CKD                         | one-way ANOVA with Bonferroni's | 4.1E-13  |
| csSIRP $\alpha^+$ Sham vs. csSIRP $\alpha^+$ CKD | one-way ANOVA with Bonferroni's | 4.4E-13  |
| fl/fl Sham vs. csSIRP $\alpha^+$ Sham            | one-way ANOVA with Bonferroni's | >0.9999  |
| fl/fl CKD vs. csSIRP $\alpha^+$ CKD              | one-way ANOVA with Bonferroni's | >0.9999  |
| Creatinine                                       |                                 |          |
| fl/fl Sham vs. fl/fl CKD                         | one-way ANOVA with Bonferroni's | 0.000004 |
| csSIRP $\alpha^+$ Sham vs. csSIRP $\alpha^+$ CKD | one-way ANOVA with Bonferroni's | 0.0002   |
| fl/fl Sham vs. csSIRP $\alpha^+$ Sham            | one-way ANOVA with Bonferroni's | >0.9999  |
| fl/fl CKD vs. csSIRP $\alpha^+$ CKD              | one-way ANOVA with Bonferroni's | 0.533    |
| <b>S5A</b>                                       |                                 |          |
| fl/fl PBS vs. HG                                 | unpaired two-tailed t test      | 0.0031   |
| AD-SIRP $\alpha^+$ PBS vs. HG                    | unpaired two-tailed t test      | 0.038    |
| csSIRP $\alpha^+$ PBS vs. HG                     | unpaired two-tailed t test      | 0.091    |
| mSIRP $\alpha^+$ PBS vs. HG                      | unpaired two-tailed t test      | 0.8011   |
| <b>S5B</b>                                       |                                 |          |
| Heart-PBS vs. HG                                 | unpaired two-tailed t test      | 0.015    |
| Gastrocnemius-PBS vs. HG                         | unpaired two-tailed t test      | 0.0415   |
| <b>S5C</b>                                       |                                 |          |
| <b>S5D</b>                                       |                                 |          |
| <b>S5E</b>                                       |                                 |          |
| <b>S5F</b>                                       |                                 |          |
| SIRP $\alpha$ 0 vs. 1 h PCS                      | unpaired two-tailed t test      | 0.1821   |
| SIRP $\alpha$ 0 vs. 6 h PCS                      | unpaired two-tailed t test      | 0.5755   |
| SIRP $\alpha$ 0 vs. 24 h PCS                     | unpaired two-tailed t test      | 0.0037   |
| pAKT 0 vs. 1 h PCS                               | unpaired two-tailed t test      | 0.1061   |
| pAKT 0 vs. 6 h PCS                               | unpaired two-tailed t test      | 0.1194   |
| pAKT 0 vs. 24 h PCS                              | unpaired two-tailed t test      | 0.0042   |
| <b>S5G</b>                                       |                                 |          |
| 0 vs. 1 h PCS                                    | unpaired two-tailed t test      | 0.3362   |
| 0 vs. 6 h PCS                                    | unpaired two-tailed t test      | 0.0532   |
| 0 vs. 24 h PCS                                   | unpaired two-tailed t test      | 0.1038   |

## TABLES

### Table S2

|                                                |                            |        |
|------------------------------------------------|----------------------------|--------|
| LVAWd (mm)                                     |                            |        |
| WT CKD vs. SIRP $\alpha$ Mt CKD                | one-way ANOVA with Tukey's | 0.9739 |
| WT CKD vs. WT Sham                             | one-way ANOVA with Tukey's | 0.1803 |
| WT CKD vs. SIRP $\alpha$ Mt Sham               | one-way ANOVA with Tukey's | 0.3752 |
| SIRP $\alpha$ Mt CKD vs. WT Sham               | one-way ANOVA with Tukey's | 0.3341 |
| SIRP $\alpha$ Mt CKD vs. SIRP $\alpha$ Mt Sham | one-way ANOVA with Tukey's | 0.5958 |
| WT Sham vs. SIRP $\alpha$ Mt Sham              | one-way ANOVA with Tukey's | 0.9771 |
| LVAWs (mm)                                     |                            |        |
| WT CKD vs. SIRP $\alpha$ Mt CKD                | one-way ANOVA with Tukey's | 0.1074 |
| WT CKD vs. WT Sham                             | one-way ANOVA with Tukey's | 0.0513 |
| WT CKD vs. SIRP $\alpha$ Mt Sham               | one-way ANOVA with Tukey's | 0.0296 |
| SIRP $\alpha$ Mt CKD vs. WT Sham               | one-way ANOVA with Tukey's | 0.9838 |
| SIRP $\alpha$ Mt CKD vs. SIRP $\alpha$ Mt Sham | one-way ANOVA with Tukey's | 0.9056 |
| WT Sham vs. SIRP $\alpha$ Mt Sham              | one-way ANOVA with Tukey's | 0.9877 |

|                                                |                            |          |
|------------------------------------------------|----------------------------|----------|
| LVIDd (mm)                                     |                            |          |
| WT CKD vs. SIRP $\alpha$ Mt CKD                | one-way ANOVA with Tukey's | 0.0863   |
| WT CKD vs. WT Sham                             | one-way ANOVA with Tukey's | 0.9168   |
| WT CKD vs. SIRP $\alpha$ Mt Sham               | one-way ANOVA with Tukey's | 0.2013   |
| KO CKD vs. WT Sham                             | one-way ANOVA with Tukey's | 0.016    |
| KO CKD vs. SIRP $\alpha$ Mt Sham               | one-way ANOVA with Tukey's | 0.9808   |
| WT Sham vs. SIRP $\alpha$ Mt Sham              | one-way ANOVA with Tukey's | 0.0489   |
| LVIDs (mm)                                     |                            |          |
| WT CKD vs. SIRP $\alpha$ Mt CKD                | one-way ANOVA with Tukey's | 0.9977   |
| WT CKD vs. WT Sham                             | one-way ANOVA with Tukey's | 0.0809   |
| WT CKD vs. SIRP $\alpha$ Mt Sham               | one-way ANOVA with Tukey's | 0.3598   |
| SIRP $\alpha$ Mt CKD vs. WT Sham               | one-way ANOVA with Tukey's | 0.1023   |
| SIRP $\alpha$ Mt CKD vs. SIRP $\alpha$ Mt Sham | one-way ANOVA with Tukey's | 0.4343   |
| WT Sham vs. SIRP $\alpha$ Mt Sham              | one-way ANOVA with Tukey's | 0.861    |
| LVPWd (mm)                                     |                            |          |
| WT CKD vs. SIRP $\alpha$ Mt CKD                | one-way ANOVA with Tukey's | 0.782    |
| WT CKD vs. WT Sham                             | one-way ANOVA with Tukey's | 0.1224   |
| WT CKD vs. SIRP $\alpha$ Mt Sham               | one-way ANOVA with Tukey's | 0.3455   |
| SIRP $\alpha$ Mt CKD vs. WT Sham               | one-way ANOVA with Tukey's | 0.5145   |
| SIRP $\alpha$ Mt CKD vs. SIRP $\alpha$ Mt Sham | one-way ANOVA with Tukey's | 0.8549   |
| WT Sham vs. SIRP $\alpha$ Mt Sham              | one-way ANOVA with Tukey's | 0.9453   |
| LVPWs (mm)                                     |                            |          |
| WT CKD vs. SIRP $\alpha$ Mt CKD                | one-way ANOVA with Tukey's | 0.5009   |
| WT CKD vs. WT Sham                             | one-way ANOVA with Tukey's | 0.1277   |
| WT CKD vs. SIRP $\alpha$ Mt Sham               | one-way ANOVA with Tukey's | 0.002    |
| SIRP $\alpha$ Mt CKD vs. WT Sham               | one-way ANOVA with Tukey's | 0.8132   |
| SIRP $\alpha$ Mt CKD vs. SIRP $\alpha$ Mt Sham | one-way ANOVA with Tukey's | 0.0512   |
| WT Sham vs. SIRP $\alpha$ Mt Sham              | one-way ANOVA with Tukey's | 0.2705   |
| LV/Height (mg/mm)                              |                            |          |
| WT CKD vs. SIRP $\alpha$ Mt CKD                | one-way ANOVA with Tukey's | 0.0559   |
| WT CKD vs. WT Sham                             | one-way ANOVA with Tukey's | 0.7958   |
| WT CKD vs. SIRP $\alpha$ Mt Sham               | one-way ANOVA with Tukey's | 0.0993   |
| SIRP $\alpha$ Mt CKD vs. WT Sham               | one-way ANOVA with Tukey's | 0.3177   |
| SIRP $\alpha$ Mt CKD vs. SIRP $\alpha$ Mt Sham | one-way ANOVA with Tukey's | 0.9975   |
| WT Sham vs. SIRP $\alpha$ Mt Sham              | one-way ANOVA with Tukey's | 0.4475   |
| LV/BW (mg/g)                                   |                            |          |
| WT Sham vs. WT CKD                             | one-way ANOVA with Tukey's | 0.0486   |
| WT Sham vs. SIRP $\alpha$ Mt Sham              | one-way ANOVA with Tukey's | 0.1804   |
| WT Sham vs. SIRP $\alpha$ Mt CKD               | one-way ANOVA with Tukey's | 0.0067   |
| WT CKD vs. SIRP $\alpha$ Mt Sham               | one-way ANOVA with Tukey's | 0.9276   |
| WT CKD vs. SIRP $\alpha$ Mt CKD                | one-way ANOVA with Tukey's | 0.8642   |
| SIRP $\alpha$ Mt Sham vs. SIRP $\alpha$ Mt CKD | one-way ANOVA with Tukey's | 0.5161   |
| CO (mL/min)                                    |                            |          |
| WT CKD vs. SIRP $\alpha$ Mt CKD                | one-way ANOVA with Tukey's | 0.0002   |
| WT CKD vs. WT Sham                             | one-way ANOVA with Tukey's | 0.0445   |
| WT CKD vs. SIRP $\alpha$ Mt Sham               | one-way ANOVA with Tukey's | 0.000011 |
| SIRP $\alpha$ Mt CKD vs. WT Sham               | one-way ANOVA with Tukey's | 0.2245   |
| SIRP $\alpha$ Mt CKD vs. SIRP $\alpha$ Mt Sham | one-way ANOVA with Tukey's | 0.7664   |
| WT Sham vs. SIRP $\alpha$ Mt Sham              | one-way ANOVA with Tukey's | 0.0297   |
| EF (%)                                         |                            |          |
| WT CKD vs. SIRP $\alpha$ Mt CKD                | one-way ANOVA with Tukey's | 0.0203   |

|                                                |                            |         |
|------------------------------------------------|----------------------------|---------|
| WT CKD vs. WT Sham                             | one-way ANOVA with Tukey's | 0.0068  |
| WT CKD vs. SIRP $\alpha$ Mt Sham               | one-way ANOVA with Tukey's | 0.0003  |
| SIRP $\alpha$ Mt CKD vs. WT Sham               | one-way ANOVA with Tukey's | 0.9691  |
| SIRP $\alpha$ Mt CKD vs. SIRP $\alpha$ Mt Sham | one-way ANOVA with Tukey's | 0.3149  |
| WT Sham vs. SIRP $\alpha$ Mt Sham              | one-way ANOVA with Tukey's | 0.5596  |
| FS (%)                                         |                            |         |
| WT Sham vs. WT CKD                             | one-way ANOVA with Tukey's | 0.0169  |
| WT Sham vs. SIRP $\alpha$ Mt Sham              | one-way ANOVA with Tukey's | 0.3812  |
| WT Sham vs. SIRP $\alpha$ Mt CKD               | one-way ANOVA with Tukey's | 0.9878  |
| WT CKD vs. SIRP $\alpha$ Mt Sham               | one-way ANOVA with Tukey's | 0.0003  |
| WT CKD vs. SIRP $\alpha$ Mt CKD                | one-way ANOVA with Tukey's | 0.0357  |
| SIRP $\alpha$ Mt Sham vs. SIRP $\alpha$ Mt CKD | one-way ANOVA with Tukey's | 0.2336  |
| HR (bpm)                                       |                            |         |
| WT CKD vs. SIRP $\alpha$ Mt CKD                | one-way ANOVA with Tukey's | 0.9892  |
| WT CKD vs. WT Sham                             | one-way ANOVA with Tukey's | 0.982   |
| WT CKD vs. SIRP $\alpha$ Mt Sham               | one-way ANOVA with Tukey's | 0.6651  |
| SIRP $\alpha$ Mt CKD vs. WT Sham               | one-way ANOVA with Tukey's | 0.8938  |
| SIRP $\alpha$ Mt CKD vs. SIRP $\alpha$ Mt Sham | one-way ANOVA with Tukey's | 0.4552  |
| WT Sham vs. SIRP $\alpha$ Mt Sham              | one-way ANOVA with Tukey's | 0.8512  |
| SV ( $\mu$ L)                                  |                            |         |
| WT CKD vs. SIRP $\alpha$ Mt CKD                | one-way ANOVA with Tukey's | 0.005   |
| WT CKD vs. WT Sham                             | one-way ANOVA with Tukey's | 0.6393  |
| WT CKD vs. SIRP $\alpha$ Mt Sham               | one-way ANOVA with Tukey's | 0.0025  |
| SIRP $\alpha$ Mt CKD vs. WT Sham               | one-way ANOVA with Tukey's | 0.0719  |
| SIRP $\alpha$ Mt CKD vs. SIRP $\alpha$ Mt Sham | one-way ANOVA with Tukey's | 0.9824  |
| WT Sham vs. SIRP $\alpha$ Mt Sham              | one-way ANOVA with Tukey's | 0.0375  |
| RWT (mm)                                       |                            |         |
| WT CKD vs. SIRP $\alpha$ Mt CKD                | one-way ANOVA with Tukey's | 0.7946  |
| WT CKD vs. WT Sham                             | one-way ANOVA with Tukey's | 0.166   |
| WT CKD vs. SIRP $\alpha$ Mt Sham               | one-way ANOVA with Tukey's | >0.9999 |
| SIRP $\alpha$ Mt CKD vs. WT Sham               | one-way ANOVA with Tukey's | 0.0185  |
| SIRP $\alpha$ Mt CKD vs. SIRP $\alpha$ Mt Sham | one-way ANOVA with Tukey's | 0.7905  |
| WT Sham vs. SIRP $\alpha$ Mt Sham              | one-way ANOVA with Tukey's | 0.1684  |
| E/A                                            |                            |         |
| WT Sham vs. WT CKD                             | one-way ANOVA with Tukey's | 0.0276  |
| WT Sham vs. SIRP $\alpha$ Mt Sham              | one-way ANOVA with Tukey's | 0.3252  |
| WT Sham vs. SIRP $\alpha$ Mt CKD               | one-way ANOVA with Tukey's | 0.1948  |
| WT CKD vs. SIRP $\alpha$ Mt Sham               | one-way ANOVA with Tukey's | 0.8989  |
| WT CKD vs. SIRP $\alpha$ Mt CKD                | one-way ANOVA with Tukey's | 0.6652  |
| SIRP $\alpha$ Mt Sham vs. SIRP $\alpha$ Mt CKD | one-way ANOVA with Tukey's | 0.9981  |
| E/e'                                           |                            |         |
| WT Sham vs. WT CKD                             | one-way ANOVA with Tukey's | 0.8708  |
| WT Sham vs. SIRP $\alpha$ Mt Sham              | one-way ANOVA with Tukey's | >0.9999 |
| WT Sham vs. SIRP $\alpha$ Mt CKD               | one-way ANOVA with Tukey's | 0.7379  |
| WT CKD vs. SIRP $\alpha$ Mt Sham               | one-way ANOVA with Tukey's | 0.9389  |
| WT CKD vs. SIRP $\alpha$ Mt CKD                | one-way ANOVA with Tukey's | 0.9944  |
| SIRP $\alpha$ Mt Sham vs. SIRP $\alpha$ Mt CKD | one-way ANOVA with Tukey's | 0.8647  |
| MPI                                            |                            |         |
| WT Sham vs. WT CKD                             | one-way ANOVA with Tukey's | 0.5263  |
| WT Sham vs. SIRP $\alpha$ Mt Sham              | one-way ANOVA with Tukey's | 0.9118  |
| WT Sham vs. SIRP $\alpha$ Mt CKD               | one-way ANOVA with Tukey's | 0.7119  |

|                                                |                            |        |
|------------------------------------------------|----------------------------|--------|
| WT CKD vs. SIRP $\alpha$ Mt Sham               | one-way ANOVA with Tukey's | 0.9711 |
| WT CKD vs. SIRP $\alpha$ Mt CKD                | one-way ANOVA with Tukey's | 0.9826 |
| SIRP $\alpha$ Mt Sham vs. SIRP $\alpha$ Mt CKD | one-way ANOVA with Tukey's | 0.9983 |

**Table S3**

fl/fl CKD vs. csSIRP $\alpha^{\text{fl/fl}}$  CKD

|               |                            |         |
|---------------|----------------------------|---------|
| LVAWd (mm)    | unpaired two-tailed t test | 0.6071  |
| LVAWs (mm)    | unpaired two-tailed t test | 0.102   |
| LVIDd (mm)    | unpaired two-tailed t test | 0.1492  |
| LVIDs (mm)    | unpaired two-tailed t test | 0.945   |
| LVPWd (mm)    | unpaired two-tailed t test | 0.3347  |
| LVPWs (mm)    | unpaired two-tailed t test | 0.9692  |
| LV Mass (mg)  | unpaired two-tailed t test | 0.4617  |
| CO (mL/min)   | unpaired two-tailed t test | 0.0007  |
| EF (%)        | unpaired two-tailed t test | 0.022   |
| FS (%)        | unpaired two-tailed t test | 0.015   |
| HR (bpm)      | unpaired two-tailed t test | 0.1264  |
| SV ( $\mu$ L) | unpaired two-tailed t test | 0.00007 |

| Figure                                         | Non-parametric Analysis Type               | p Value    |
|------------------------------------------------|--------------------------------------------|------------|
| <b>1A</b>                                      |                                            |            |
| BUN                                            |                                            |            |
| WT Sham vs. WT CKD                             | Kruskal-Wallis-Dunn's Multiple Comparisons | 0.0003     |
| WT Sham vs. SIRP $\alpha$ Mt Sham              | Kruskal-Wallis-Dunn's Multiple Comparisons | >0.9999    |
| SIRP $\alpha$ Mt Sham vs. SIRP $\alpha$ Mt CKD | Kruskal-Wallis-Dunn's Multiple Comparisons | 0.0045     |
| WT CKD vs. SIRP $\alpha$ Mt CKD                | Kruskal-Wallis-Dunn's Multiple Comparisons | >0.9999    |
| Creatinine                                     |                                            |            |
| WT Sham vs. WT CKD                             | Kruskal-Wallis-Dunn's Multiple Comparisons | 0.0038     |
| SIRP $\alpha$ Mt Sham vs. SIRP $\alpha$ Mt CKD | Kruskal-Wallis-Dunn's Multiple Comparisons | 0.0244     |
| WT Sham vs. SIRP $\alpha$ Mt Sham              | Kruskal-Wallis-Dunn's Multiple Comparisons | >0.9999    |
| WT CKD vs. SIRP $\alpha$ Mt CKD                | Kruskal-Wallis-Dunn's Multiple Comparisons | >0.9999    |
| <b>1B</b>                                      | Mann-Whitney                               | 0.0006     |
| <b>1D</b>                                      | Mann-Whitney                               | 0.0003     |
| <b>1E</b>                                      | Mann-Whitney                               | 0.00000001 |
| <b>2B</b>                                      |                                            |            |
| WT Sham vs. WT CKD                             | Kruskal-Wallis-Dunn's Multiple Comparisons | 0.0602     |
| WT CKD vs. SIRP $\alpha$ Mt CKD                | Kruskal-Wallis-Dunn's Multiple Comparisons | 0.2404     |
| SIRP $\alpha$ Mt Sham vs. SIRP $\alpha$ Mt CKD | Kruskal-Wallis-Dunn's Multiple Comparisons | 0.5303     |
| WT Sham vs. SIRP $\alpha$ Mt Sham              | Kruskal-Wallis-Dunn's Multiple Comparisons | >0.9999    |
| <b>2C</b>                                      |                                            |            |
| WT Sham vs. WT CKD                             | Kruskal-Wallis-Dunn's Multiple Comparisons | 0.0984     |
| WT Sham vs. SIRP $\alpha$ Mt Sham              | Kruskal-Wallis-Dunn's Multiple Comparisons | 0.8988     |
| WT CKD vs. SIRP $\alpha$ Mt CKD                | Kruskal-Wallis-Dunn's Multiple Comparisons | 0.1842     |
| SIRP $\alpha$ Mt Sham vs. SIRP $\alpha$ Mt CKD | Kruskal-Wallis-Dunn's Multiple Comparisons | 0.5698     |
| <b>2D</b>                                      |                                            |            |
| WT Sham vs. WT CKD                             | Kruskal-Wallis-Dunn's Multiple Comparisons | 0.1861     |
| WT Sham vs. SIRP $\alpha$ Mt Sham              | Kruskal-Wallis-Dunn's Multiple Comparisons | 0.0664     |
| SIRP $\alpha$ Mt Sham vs. SIRP $\alpha$ Mt CKD | Kruskal-Wallis-Dunn's Multiple Comparisons | >0.9999    |
| WT CKD vs. SIRP $\alpha$ Mt CKD                | Kruskal-Wallis-Dunn's Multiple Comparisons | 0.0027     |

|                                                  |                                            |         |
|--------------------------------------------------|--------------------------------------------|---------|
| <b>2F</b>                                        | Mann-Whitney                               | 0.0173  |
| <b>2G</b>                                        | Mann-Whitney                               | 0.0173  |
| <b>2H</b>                                        | Mann-Whitney                               | 0.0043  |
| <b>3A</b>                                        |                                            |         |
| WT Sham vs. WT CKD                               | Kruskal-Wallis-Dunn's Multiple Comparisons | 0.507   |
| WT Sham vs. SIRP $\alpha$ Mt Sham                | Kruskal-Wallis-Dunn's Multiple Comparisons | 0.034   |
| SIRP $\alpha$ Mt Sham vs. SIRP $\alpha$ Mt CKD   | Kruskal-Wallis-Dunn's Multiple Comparisons | 0.4455  |
| WT CKD vs. SIRP $\alpha$ Mt CKD                  | Kruskal-Wallis-Dunn's Multiple Comparisons | 0.028   |
| <b>3B</b>                                        |                                            |         |
| WT Sham vs. WT CKD                               | Kruskal-Wallis-Dunn's Multiple Comparisons | 0.0455  |
| WT Sham vs. SIRP $\alpha$ Mt Sham                | Kruskal-Wallis-Dunn's Multiple Comparisons | 0.0572  |
| WT CKD vs. SIRP $\alpha$ Mt CKD                  | Kruskal-Wallis-Dunn's Multiple Comparisons | 0.7657  |
| SIRP $\alpha$ Mt Sham vs. SIRP $\alpha$ Mt CKD   | Kruskal-Wallis-Dunn's Multiple Comparisons | 0.6605  |
| <b>3C (top panel)</b>                            |                                            |         |
| WT Sham vs. WT CKD                               | Kruskal-Wallis-Dunn's Multiple Comparisons | 0.1019  |
| WT Sham vs. SIRP $\alpha$ Mt Sham                | Kruskal-Wallis-Dunn's Multiple Comparisons | >0.9999 |
| WT CKD vs. SIRP $\alpha$ Mt CKD                  | Kruskal-Wallis-Dunn's Multiple Comparisons | 0.0004  |
| SIRP $\alpha$ Mt Sham vs. SIRP $\alpha$ Mt CKD   | Kruskal-Wallis-Dunn's Multiple Comparisons | >0.9999 |
| <b>3C (bottom panel)</b>                         |                                            |         |
| fl/fl Sham vs. fl/fl CKD                         | Kruskal-Wallis-Dunn's Multiple Comparisons | 0.0153  |
| fl/fl Sham vs. csSIRP $\alpha^+$ Sham            | Kruskal-Wallis-Dunn's Multiple Comparisons | >0.9999 |
| csSIRP $\alpha^+$ Sham vs. csSIRP $\alpha^+$ CKD | Kruskal-Wallis-Dunn's Multiple Comparisons | 0.1388  |
| fl/fl CKD vs. csSIRP $\alpha^+$ CKD              | Kruskal-Wallis-Dunn's Multiple Comparisons | 0.9686  |
| <b>3D</b>                                        |                                            |         |
| fl/fl Sham vs. fl/fl CKD                         | Kruskal-Wallis-Dunn's Multiple Comparisons | 0.0645  |
| fl/fl CKD vs. csSIRP $\alpha^+$ CKD              | Kruskal-Wallis-Dunn's Multiple Comparisons | 0.0028  |
| fl/fl CKD vs. mSIRP $\alpha^+$ CKD               | Kruskal-Wallis-Dunn's Multiple Comparisons | 0.1517  |
| csSIRP $\alpha^+$ Sham vs. csSIRP $\alpha^+$ CKD | Kruskal-Wallis-Dunn's Multiple Comparisons | >0.9999 |
| mSIRP $\alpha^+$ Sham vs. mSIRP $\alpha^+$ CKD   | Kruskal-Wallis-Dunn's Multiple Comparisons | >0.9999 |
| <b>3E</b>                                        |                                            |         |
| <b>ACC1</b>                                      |                                            |         |
| WT Sham vs. WT CKD                               | Kruskal-Wallis-Dunn's Multiple Comparisons | 0.0008  |
| WT Sham vs. SIRP $\alpha$ Mt Sham                | Kruskal-Wallis-Dunn's Multiple Comparisons | 0.6313  |
| WT CKD vs. SIRP $\alpha$ Mt CKD                  | Kruskal-Wallis-Dunn's Multiple Comparisons | >0.9999 |
| SIRP $\alpha$ Mt Sham vs. SIRP $\alpha$ Mt CKD   | Kruskal-Wallis-Dunn's Multiple Comparisons | 0.2484  |
| <b>ANP</b>                                       |                                            |         |
| WT Sham vs. WT CKD                               | Kruskal-Wallis-Dunn's Multiple Comparisons | 0.0612  |
| WT Sham vs. SIRP $\alpha$ Mt Sham                | Kruskal-Wallis-Dunn's Multiple Comparisons | 0.0029  |
| WT CKD vs. SIRP $\alpha$ Mt CKD                  | Kruskal-Wallis-Dunn's Multiple Comparisons | 0.7117  |
| SIRP $\alpha$ Mt Sham vs. SIRP $\alpha$ Mt CKD   | Kruskal-Wallis-Dunn's Multiple Comparisons | >0.9999 |
| <b>BNP</b>                                       |                                            |         |
| WT Sham vs. WT CKD                               | Kruskal-Wallis-Dunn's Multiple Comparisons | 0.0047  |
| WT Sham vs. SIRP $\alpha$ Mt Sham                | Kruskal-Wallis-Dunn's Multiple Comparisons | 0.137   |
| WT CKD vs. SIRP $\alpha$ Mt CKD                  | Kruskal-Wallis-Dunn's Multiple Comparisons | >0.9999 |
| SIRP $\alpha$ Mt Sham vs. SIRP $\alpha$ Mt CKD   | Kruskal-Wallis-Dunn's Multiple Comparisons | >0.9999 |
| <b>CPT1b</b>                                     |                                            |         |
| WT Sham vs. WT CKD                               | Kruskal-Wallis-Dunn's Multiple Comparisons | 0.0031  |
| WT Sham vs. SIRP $\alpha$ Mt Sham                | Kruskal-Wallis-Dunn's Multiple Comparisons | 0.0252  |
| WT CKD vs. SIRP $\alpha$ Mt CKD                  | Kruskal-Wallis-Dunn's Multiple Comparisons | >0.9999 |
| SIRP $\alpha$ Mt Sham vs. SIRP $\alpha$ Mt CKD   | Kruskal-Wallis-Dunn's Multiple Comparisons | >0.9999 |
| <b>GLUT1</b>                                     |                                            |         |

|                                                              |                                            |         |
|--------------------------------------------------------------|--------------------------------------------|---------|
| WT Sham vs. WT CKD                                           | Kruskal-Wallis-Dunn's Multiple Comparisons | 0.00099 |
| WT Sham vs. SIRP $\alpha$ Mt Sham                            | Kruskal-Wallis-Dunn's Multiple Comparisons | 0.0197  |
| WT CKD vs. SIRP $\alpha$ Mt CKD                              | Kruskal-Wallis-Dunn's Multiple Comparisons | 0.1276  |
| SIRP $\alpha$ Mt Sham vs. SIRP $\alpha$ Mt CKD               | Kruskal-Wallis-Dunn's Multiple Comparisons | 0.7845  |
| <b>GLUT4</b>                                                 |                                            |         |
| WT Sham vs. WT CKD                                           | Kruskal-Wallis-Dunn's Multiple Comparisons | 0.0015  |
| WT Sham vs. SIRP $\alpha$ Mt Sham                            | Kruskal-Wallis-Dunn's Multiple Comparisons | 0.0095  |
| WT CKD vs. SIRP $\alpha$ Mt CKD                              | Kruskal-Wallis-Dunn's Multiple Comparisons | 0.9946  |
| SIRP $\alpha$ Mt Sham vs. SIRP $\alpha$ Mt CKD               | Kruskal-Wallis-Dunn's Multiple Comparisons | >0.9999 |
| <b>MHC<math>\alpha</math></b>                                |                                            |         |
| WT Sham vs. WT CKD                                           | Kruskal-Wallis-Dunn's Multiple Comparisons | 0.0068  |
| WT Sham vs. SIRP $\alpha$ Mt Sham                            | Kruskal-Wallis-Dunn's Multiple Comparisons | 0.0367  |
| WT CKD vs. SIRP $\alpha$ Mt CKD                              | Kruskal-Wallis-Dunn's Multiple Comparisons | >0.9999 |
| SIRP $\alpha$ Mt Sham vs. SIRP $\alpha$ Mt CKD               | Kruskal-Wallis-Dunn's Multiple Comparisons | >0.9999 |
| <b>MHC<math>\beta</math></b>                                 |                                            |         |
| WT Sham vs. WT CKD                                           | Kruskal-Wallis-Dunn's Multiple Comparisons | 0.0071  |
| WT Sham vs. SIRP $\alpha$ Mt Sham                            | Kruskal-Wallis-Dunn's Multiple Comparisons | 0.1726  |
| WT CKD vs. SIRP $\alpha$ Mt CKD                              | Kruskal-Wallis-Dunn's Multiple Comparisons | >0.9999 |
| SIRP $\alpha$ Mt Sham vs. SIRP $\alpha$ Mt CKD               | Kruskal-Wallis-Dunn's Multiple Comparisons | >0.9999 |
| <b>PGC1a</b>                                                 |                                            |         |
| WT Sham vs. WT CKD                                           | Kruskal-Wallis-Dunn's Multiple Comparisons | 0.0005  |
| WT Sham vs. SIRP $\alpha$ Mt Sham                            | Kruskal-Wallis-Dunn's Multiple Comparisons | 0.2781  |
| WT CKD vs. SIRP $\alpha$ Mt CKD                              | Kruskal-Wallis-Dunn's Multiple Comparisons | 0.1937  |
| SIRP $\alpha$ Mt Sham vs. SIRP $\alpha$ Mt CKD               | Kruskal-Wallis-Dunn's Multiple Comparisons | >0.9999 |
| <b>PPAR<math>\alpha</math></b>                               |                                            |         |
| WT Sham vs. WT CKD                                           | Kruskal-Wallis-Dunn's Multiple Comparisons | 0.0003  |
| WT Sham vs. SIRP $\alpha$ Mt Sham                            | Kruskal-Wallis-Dunn's Multiple Comparisons | 0.0489  |
| WT CKD vs. SIRP $\alpha$ Mt CKD                              | Kruskal-Wallis-Dunn's Multiple Comparisons | >0.9999 |
| SIRP $\alpha$ Mt Sham vs. SIRP $\alpha$ Mt CKD               | Kruskal-Wallis-Dunn's Multiple Comparisons | >0.9999 |
| <b>UCP3</b>                                                  |                                            |         |
| WT Sham vs. WT CKD                                           | Kruskal-Wallis-Dunn's Multiple Comparisons | >0.9999 |
| WT Sham vs. SIRP $\alpha$ Mt Sham                            | Kruskal-Wallis-Dunn's Multiple Comparisons | 0.03    |
| WT CKD vs. SIRP $\alpha$ Mt CKD                              | Kruskal-Wallis-Dunn's Multiple Comparisons | 0.6269  |
| SIRP $\alpha$ Mt Sham vs. SIRP $\alpha$ Mt CKD               | Kruskal-Wallis-Dunn's Multiple Comparisons | 0.3247  |
| <b>3F</b>                                                    |                                            |         |
| <b>ACC1</b>                                                  |                                            |         |
| fl/fl Sham vs. fl/fl CKD                                     | Kruskal-Wallis-Dunn's Multiple Comparisons | 0.0424  |
| fl/fl Sham vs. mSIRP $\alpha^{\Delta}$ Sham                  | Kruskal-Wallis-Dunn's Multiple Comparisons | >0.9999 |
| mSIRP $\alpha^{\Delta}$ Sham vs. mSIRP $\alpha^{\Delta}$ CKD | Kruskal-Wallis-Dunn's Multiple Comparisons | 0.6145  |
| fl/fl CKD vs. mSIRP $\alpha^{\Delta}$ CKD                    | Kruskal-Wallis-Dunn's Multiple Comparisons | 0.6708  |
| <b>ANP</b>                                                   |                                            |         |
| fl/fl Sham vs. fl/fl CKD                                     | Kruskal-Wallis-Dunn's Multiple Comparisons | 0.0014  |
| fl/fl Sham vs. mSIRP $\alpha^{\Delta}$ Sham                  | Kruskal-Wallis-Dunn's Multiple Comparisons | 0.0155  |
| mSIRP $\alpha^{\Delta}$ Sham vs. mSIRP $\alpha^{\Delta}$ CKD | Kruskal-Wallis-Dunn's Multiple Comparisons | 0.3926  |
| fl/fl CKD vs. mSIRP $\alpha^{\Delta}$ CKD                    | Kruskal-Wallis-Dunn's Multiple Comparisons | 0.0764  |
| <b>BNP</b>                                                   |                                            |         |
| fl/fl Sham vs. fl/fl CKD                                     | Kruskal-Wallis-Dunn's Multiple Comparisons | 0.0035  |
| fl/fl Sham vs. mSIRP $\alpha^{\Delta}$ Sham                  | Kruskal-Wallis-Dunn's Multiple Comparisons | >0.9999 |
| mSIRP $\alpha^{\Delta}$ Sham vs. mSIRP $\alpha^{\Delta}$ CKD | Kruskal-Wallis-Dunn's Multiple Comparisons | 0.0042  |
| fl/fl CKD vs. mSIRP $\alpha^{\Delta}$ CKD                    | Kruskal-Wallis-Dunn's Multiple Comparisons | >0.9999 |
| <b>CPT1b</b>                                                 |                                            |         |

|                                                  |                                            |         |
|--------------------------------------------------|--------------------------------------------|---------|
| fl/fl Sham vs. fl/fl CKD                         | Kruskal-Wallis-Dunn's Multiple Comparisons | 0.0587  |
| fl/fl Sham vs. mSIRP $\alpha^+$ Sham             | Kruskal-Wallis-Dunn's Multiple Comparisons | >0.9999 |
| mSIRP $\alpha^+$ Sham vs. mSIRP $\alpha^+$ CKD   | Kruskal-Wallis-Dunn's Multiple Comparisons | >0.9999 |
| fl/fl CKD vs. mSIRP $\alpha^+$ CKD               | Kruskal-Wallis-Dunn's Multiple Comparisons | 0.1448  |
| <b>GLUT1</b>                                     |                                            |         |
| fl/fl Sham vs. fl/fl CKD                         | Kruskal-Wallis-Dunn's Multiple Comparisons | 0.00094 |
| fl/fl Sham vs. mSIRP $\alpha^+$ Sham             | Kruskal-Wallis-Dunn's Multiple Comparisons | 0.8033  |
| mSIRP $\alpha^+$ Sham vs. mSIRP $\alpha^+$ CKD   | Kruskal-Wallis-Dunn's Multiple Comparisons | >0.9999 |
| fl/fl CKD vs. mSIRP $\alpha^+$ CKD               | Kruskal-Wallis-Dunn's Multiple Comparisons | 0.8033  |
| <b>GLUT4</b>                                     |                                            |         |
| fl/fl Sham vs. fl/fl CKD                         | Kruskal-Wallis-Dunn's Multiple Comparisons | 0.0006  |
| fl/fl Sham vs. mSIRP $\alpha^+$ Sham             | Kruskal-Wallis-Dunn's Multiple Comparisons | 0.3183  |
| mSIRP $\alpha^+$ Sham vs. mSIRP $\alpha^+$ CKD   | Kruskal-Wallis-Dunn's Multiple Comparisons | 0.5474  |
| fl/fl CKD vs. mSIRP $\alpha^+$ CKD               | Kruskal-Wallis-Dunn's Multiple Comparisons | >0.9999 |
| <b>MHC<math>\alpha</math></b>                    |                                            |         |
| fl/fl Sham vs. fl/fl CKD                         | Kruskal-Wallis-Dunn's Multiple Comparisons | 0.013   |
| fl/fl Sham vs. mSIRP $\alpha^+$ Sham             | Kruskal-Wallis-Dunn's Multiple Comparisons | 0.0932  |
| mSIRP $\alpha^+$ Sham vs. mSIRP $\alpha^+$ CKD   | Kruskal-Wallis-Dunn's Multiple Comparisons | 0.8612  |
| fl/fl CKD vs. mSIRP $\alpha^+$ CKD               | Kruskal-Wallis-Dunn's Multiple Comparisons | 0.235   |
| <b>MHC<math>\beta</math></b>                     |                                            |         |
| fl/fl Sham vs. fl/fl CKD                         | Kruskal-Wallis-Dunn's Multiple Comparisons | 0.0035  |
| fl/fl Sham vs. mSIRP $\alpha^+$ Sham             | Kruskal-Wallis-Dunn's Multiple Comparisons | 0.0775  |
| mSIRP $\alpha^+$ Sham vs. mSIRP $\alpha^+$ CKD   | Kruskal-Wallis-Dunn's Multiple Comparisons | 0.3646  |
| fl/fl CKD vs. mSIRP $\alpha^+$ CKD               | Kruskal-Wallis-Dunn's Multiple Comparisons | 0.0326  |
| <b>PGC1<math>\alpha</math></b>                   |                                            |         |
| fl/fl Sham vs. fl/fl CKD                         | Kruskal-Wallis-Dunn's Multiple Comparisons | 0.0282  |
| fl/fl Sham vs. mSIRP $\alpha^+$ Sham             | Kruskal-Wallis-Dunn's Multiple Comparisons | >0.9999 |
| mSIRP $\alpha^+$ Sham vs. mSIRP $\alpha^+$ CKD   | Kruskal-Wallis-Dunn's Multiple Comparisons | >0.9999 |
| fl/fl CKD vs. mSIRP $\alpha^+$ CKD               | Kruskal-Wallis-Dunn's Multiple Comparisons | 0.0221  |
| <b>PPAR<math>\alpha</math></b>                   |                                            |         |
| fl/fl Sham vs. fl/fl CKD                         | Kruskal-Wallis-Dunn's Multiple Comparisons | 0.0242  |
| fl/fl Sham vs. mSIRP $\alpha^+$ Sham             | Kruskal-Wallis-Dunn's Multiple Comparisons | 0.8033  |
| mSIRP $\alpha^+$ Sham vs. mSIRP $\alpha^+$ CKD   | Kruskal-Wallis-Dunn's Multiple Comparisons | >0.9999 |
| fl/fl CKD vs. mSIRP $\alpha^+$ CKD               | Kruskal-Wallis-Dunn's Multiple Comparisons | 0.3144  |
| <b>UCP3</b>                                      |                                            |         |
| fl/fl Sham vs. fl/fl CKD                         | Kruskal-Wallis-Dunn's Multiple Comparisons | 0.0489  |
| fl/fl Sham vs. mSIRP $\alpha^+$ Sham             | Kruskal-Wallis-Dunn's Multiple Comparisons | >0.9999 |
| mSIRP $\alpha^+$ Sham vs. mSIRP $\alpha^+$ CKD   | Kruskal-Wallis-Dunn's Multiple Comparisons | 0.0031  |
| fl/fl CKD vs. mSIRP $\alpha^+$ CKD               | Kruskal-Wallis-Dunn's Multiple Comparisons | >0.9999 |
| <b>3G</b>                                        |                                            |         |
| csSIRP $\alpha^+$ Sham vs. csSIRP $\alpha^+$ CKD |                                            |         |
| ACC1                                             | Mann-Whitney                               | 0.4452  |
| ANP                                              | Mann-Whitney                               | 0.0385  |
| BNP                                              | Mann-Whitney                               | >0.9999 |
| CPT1b                                            | Mann-Whitney                               | 0.4452  |
| GLUT1                                            | Mann-Whitney                               | 0.1375  |
| GLUT4                                            | Mann-Whitney                               | 0.2949  |
| MHC $\alpha$                                     | Mann-Whitney                               | 0.3124  |
| MHC $\beta$                                      | Mann-Whitney                               | 0.0734  |
| PGC1 $\alpha$                                    | Mann-Whitney                               | 0.6282  |
| PPAR $\alpha$                                    | Mann-Whitney                               | 0.2949  |



|                                                                |                                            |         |
|----------------------------------------------------------------|--------------------------------------------|---------|
| UCP3                                                           | Mann-Whitney                               | 0.9452  |
| <b>4A</b>                                                      |                                            |         |
| WT Sham vs. WT CKD                                             | Kruskal-Wallis-Dunn's Multiple Comparisons | 0.034   |
| WT Sham vs. SIRP $\alpha$ Mt Sham                              | Kruskal-Wallis-Dunn's Multiple Comparisons | >0.9999 |
| SIRP $\alpha$ Mt Sham vs. SIRP $\alpha$ Mt CKD                 | Kruskal-Wallis-Dunn's Multiple Comparisons | >0.9999 |
| WT CKD vs. SIRP $\alpha$ Mt CKD                                | Kruskal-Wallis-Dunn's Multiple Comparisons | 0.0046  |
| <b>4B</b>                                                      |                                            |         |
| $\alpha$ SMA                                                   |                                            |         |
| WT Sham vs. WT CKD                                             | Kruskal-Wallis-Dunn's Multiple Comparisons | 0.0486  |
| WT Sham vs. SIRP $\alpha$ Mt Sham                              | Kruskal-Wallis-Dunn's Multiple Comparisons | >0.9999 |
| SIRP $\alpha$ Mt Sham vs. SIRP $\alpha$ Mt CKD                 | Kruskal-Wallis-Dunn's Multiple Comparisons | 0.4913  |
| WT CKD vs. SIRP $\alpha$ Mt CKD                                | Kruskal-Wallis-Dunn's Multiple Comparisons | >0.9999 |
| Fibronectin                                                    |                                            |         |
| WT Sham vs. WT CKD                                             | Kruskal-Wallis-Dunn's Multiple Comparisons | 0.0051  |
| WT Sham vs. SIRP $\alpha$ Mt Sham                              | Kruskal-Wallis-Dunn's Multiple Comparisons | 0.0007  |
| SIRP $\alpha$ Mt Sham vs. SIRP $\alpha$ Mt CKD                 | Kruskal-Wallis-Dunn's Multiple Comparisons | >0.9999 |
| WT CKD vs. SIRP $\alpha$ Mt CKD                                | Kruskal-Wallis-Dunn's Multiple Comparisons | >0.9999 |
| pAKT                                                           |                                            |         |
| WT Sham vs. WT CKD                                             | Kruskal-Wallis-Dunn's Multiple Comparisons | 0.0087  |
| WT Sham vs. SIRP $\alpha$ Mt Sham                              | Kruskal-Wallis-Dunn's Multiple Comparisons | 0.1506  |
| SIRP $\alpha$ Mt Sham vs. SIRP $\alpha$ Mt CKD                 | Kruskal-Wallis-Dunn's Multiple Comparisons | >0.9999 |
| WT CKD vs. SIRP $\alpha$ Mt CKD                                | Kruskal-Wallis-Dunn's Multiple Comparisons | 0.22    |
| PI3K                                                           |                                            |         |
| WT Sham vs. WT CKD                                             | Kruskal-Wallis-Dunn's Multiple Comparisons | 0.0843  |
| WT Sham vs. SIRP $\alpha$ Mt Sham                              | Kruskal-Wallis-Dunn's Multiple Comparisons | 0.4171  |
| SIRP $\alpha$ Mt Sham vs. SIRP $\alpha$ Mt CKD                 | Kruskal-Wallis-Dunn's Multiple Comparisons | >0.9999 |
| WT CKD vs. SIRP $\alpha$ Mt CKD                                | Kruskal-Wallis-Dunn's Multiple Comparisons | >0.9999 |
| <b>4C</b>                                                      |                                            |         |
| $\alpha$ SMA                                                   |                                            |         |
| fl/fl Sham vs. fl/fl CKD                                       | Kruskal-Wallis-Dunn's Multiple Comparisons | 0.0026  |
| fl/fl Sham vs. mSIRP $\alpha^{\Delta}$ Sham                    | Kruskal-Wallis-Dunn's Multiple Comparisons | >0.9999 |
| mSIRP $\alpha^{\Delta}$ Sham vs. mSIRP $\alpha^{\Delta}$ CKD   | Kruskal-Wallis-Dunn's Multiple Comparisons | 0.2887  |
| fl/fl CKD vs. mSIRP $\alpha^{\Delta}$ CKD                      | Kruskal-Wallis-Dunn's Multiple Comparisons | >0.9999 |
| Fibronectin                                                    |                                            |         |
| fl/fl Sham vs. fl/fl CKD                                       | Kruskal-Wallis-Dunn's Multiple Comparisons | 0.0242  |
| fl/fl Sham vs. mSIRP $\alpha^{\Delta}$ Sham                    | Kruskal-Wallis-Dunn's Multiple Comparisons | >0.9999 |
| mSIRP $\alpha^{\Delta}$ Sham vs. mSIRP $\alpha^{\Delta}$ CKD   | Kruskal-Wallis-Dunn's Multiple Comparisons | >0.9999 |
| fl/fl CKD vs. mSIRP $\alpha^{\Delta}$ CKD                      | Kruskal-Wallis-Dunn's Multiple Comparisons | 0.4158  |
| pAKT                                                           |                                            |         |
| fl/fl Sham vs. fl/fl CKD                                       | Kruskal-Wallis-Dunn's Multiple Comparisons | >0.9999 |
| fl/fl Sham vs. mSIRP $\alpha^{\Delta}$ Sham                    | Kruskal-Wallis-Dunn's Multiple Comparisons | >0.9999 |
| mSIRP $\alpha^{\Delta}$ Sham vs. mSIRP $\alpha^{\Delta}$ CKD   | Kruskal-Wallis-Dunn's Multiple Comparisons | >0.9999 |
| fl/fl CKD vs. mSIRP $\alpha^{\Delta}$ CKD                      | Kruskal-Wallis-Dunn's Multiple Comparisons | >0.9999 |
| PI3K                                                           |                                            |         |
| fl/fl Sham vs. fl/fl CKD                                       | Kruskal-Wallis-Dunn's Multiple Comparisons | 0.0242  |
| fl/fl Sham vs. mSIRP $\alpha^{\Delta}$ Sham                    | Kruskal-Wallis-Dunn's Multiple Comparisons | >0.9999 |
| mSIRP $\alpha^{\Delta}$ Sham vs. mSIRP $\alpha^{\Delta}$ CKD   | Kruskal-Wallis-Dunn's Multiple Comparisons | 0.1825  |
| fl/fl CKD vs. mSIRP $\alpha^{\Delta}$ CKD                      | Kruskal-Wallis-Dunn's Multiple Comparisons | >0.9999 |
| <b>4D</b>                                                      |                                            |         |
| csSIRP $\alpha^{\Delta}$ Sham vs. csSIRP $\alpha^{\Delta}$ CKD |                                            |         |
| $\alpha$ SMA                                                   | Mann-Whitney                               | 0.4557  |

|                                                          |                                            |         |
|----------------------------------------------------------|--------------------------------------------|---------|
| fibronectin                                              | Mann-Whitney                               | 0.1375  |
| pAKT                                                     | Mann-Whitney                               | 0.366   |
| PI3K                                                     | Mann-Whitney                               | 0.535   |
| <b>5A</b>                                                |                                            |         |
| fl/fl Sham vs. fl/fl CKD                                 | Kruskal-Wallis-Dunn's Multiple Comparisons | 0.005   |
| fl/fl Sham vs. mSIRP $\alpha^+$ Sham                     | Kruskal-Wallis-Dunn's Multiple Comparisons | >0.9999 |
| mSIRP $\alpha^+$ Sham vs. mSIRP $\alpha^+$ CKD           | Kruskal-Wallis-Dunn's Multiple Comparisons | >0.9999 |
| fl/fl CKD vs. mSIRP $\alpha^+$ CKD                       | Kruskal-Wallis-Dunn's Multiple Comparisons | 0.0359  |
| <b>6A</b>                                                |                                            |         |
| pAKT/AKT                                                 |                                            |         |
| fl/fl PBS vs. fl/fl rSIRP $\alpha$                       | Mann-Whitney                               | 0.0022  |
| mSIRP $\alpha^+$ PBS vs. mSIRP $\alpha^+$ rSIRP $\alpha$ | Mann-Whitney                               | 0.0303  |
| p-IGF1R/IGF1R                                            |                                            |         |
| fl/fl PBS vs. fl/fl rSIRP $\alpha$                       | Mann-Whitney                               | 0.0022  |
| mSIRP $\alpha^+$ PBS vs. mSIRP $\alpha^+$ rSIRP $\alpha$ | Mann-Whitney                               | 0.0317  |
| <b>6B</b>                                                |                                            |         |
| pAKT 15min                                               | Mann-Whitney                               | 0.1292  |
| pAKT 30 min                                              | Mann-Whitney                               | 0.3148  |
| pAKT 1h                                                  | Mann-Whitney                               | 0.2698  |
| pAKT 6h                                                  | Mann-Whitney                               | 0.0029  |
| pAKT 24h                                                 | Mann-Whitney                               | 0.0295  |
| pY-IGF1R 15min                                           | Mann-Whitney                               | 0.0286  |
| pY-IGF1R 30min                                           | Mann-Whitney                               | 0.0286  |
| pY-IGF1R 1h                                              | Mann-Whitney                               | 0.0286  |
| pY-IGF1R 6h                                              | Mann-Whitney                               | 0.0286  |
| pY-IGF1R 24h                                             | Mann-Whitney                               | 0.0571  |
| Fibronectin 15min                                        | Mann-Whitney                               | 0.1724  |
| Fibronectin 30min                                        | Mann-Whitney                               | 0.0484  |
| Fibronectin 1h                                           | Mann-Whitney                               | 0.0004  |
| Fibronectin 6h                                           | Mann-Whitney                               | 0.0111  |
| Fibronectin 24h                                          | Mann-Whitney                               | 0.0004  |
| <b>6C</b>                                                |                                            |         |
| SIRP $\alpha$                                            | Mann-Whitney                               | 0.0012  |
| pAKT/AKT                                                 | Mann-Whitney                               | 0.0012  |
| p-IGF1R/IGF1R                                            | Mann-Whitney                               | 0.0022  |
| <b>6D</b>                                                |                                            |         |
| SIRP $\alpha$                                            | Mann-Whitney                               | 0.0079  |
| pAKT/AKT                                                 | Mann-Whitney                               | 0.0087  |
| p-IGF1R/IGF1R                                            | Mann-Whitney                               | 0.0087  |
| <b>7A</b>                                                | Mann-Whitney                               | 0.0022  |
| <b>7B</b>                                                | Mann-Whitney                               | 0.0286  |
| <b>7C</b>                                                |                                            |         |
| 0 vs. 1 h HG                                             | Mann-Whitney                               | 0.5476  |
| 0 vs. 6 h HG                                             | Mann-Whitney                               | 0.3095  |
| 0 vs. 24 h HG                                            | Mann-Whitney                               | 0.0079  |
| <b>7D</b>                                                |                                            |         |
| 0 vs. 1 h HG                                             | Mann-Whitney                               | 0.2222  |
| 0 vs. 6 h HG                                             | Mann-Whitney                               | 0.0556  |
| 0 vs. 24 h HG                                            | Mann-Whitney                               | 0.0079  |
| <b>7E</b>                                                | Mann-Whitney                               | 0.0043  |
| <b>S1A</b>                                               |                                            |         |

|                                                  |                                            |         |
|--------------------------------------------------|--------------------------------------------|---------|
| SIRP $\alpha$                                    | Mann-Whitney                               | 0.0281  |
| ANP                                              | Mann-Whitney                               | 0.1304  |
| BNP                                              | Mann-Whitney                               | 0.0516  |
| UCP3                                             | Mann-Whitney                               | 0.7733  |
| <b>S1B</b>                                       |                                            |         |
| PI3K                                             | Mann-Whitney                               | 0.0022  |
| pAKT                                             | Mann-Whitney                               | 0.0317  |
| GLUT4                                            | Mann-Whitney                               | 0.0238  |
| <b>S2A (left panel)</b>                          |                                            |         |
| WT Sham vs. WT CKD                               | Kruskal-Wallis-Dunn's Multiple Comparisons | 0.0153  |
| WT CKD vs. SIRP $\alpha$ Mt CKD                  | Kruskal-Wallis-Dunn's Multiple Comparisons | >0.9999 |
| SIRP $\alpha$ Mt Sham vs. SIRP $\alpha$ Mt CKD   | Kruskal-Wallis-Dunn's Multiple Comparisons | 0.4011  |
| WT Sham vs. SIRP $\alpha$ Mt Sham                | Kruskal-Wallis-Dunn's Multiple Comparisons | 0.3848  |
| <b>S2A (right panel)</b>                         |                                            |         |
| fl/fl Sham vs. fl/fl CKD                         | Kruskal-Wallis-Dunn's Multiple Comparisons | >0.9999 |
| fl/fl Sham vs. csSIRP $\alpha^+$ Sham            | Kruskal-Wallis-Dunn's Multiple Comparisons | 0.0475  |
| csSIRP $\alpha^+$ Sham vs. csSIRP $\alpha^+$ CKD | Kruskal-Wallis-Dunn's Multiple Comparisons | 0.0096  |
| fl/fl CKD vs. csSIRP $\alpha^+$ CKD              | Kruskal-Wallis-Dunn's Multiple Comparisons | 0.4087  |
| <b>S2B</b>                                       |                                            |         |
| BUN                                              |                                            |         |
| fl/fl Sham vs. fl/fl CKD                         | Kruskal-Wallis-Dunn's Multiple Comparisons | 0.0018  |
| csSIRP $\alpha^+$ Sham vs. csSIRP $\alpha^+$ CKD | Kruskal-Wallis-Dunn's Multiple Comparisons | 0.0007  |
| fl/fl Sham vs. csSIRP $\alpha^+$ Sham            | Kruskal-Wallis-Dunn's Multiple Comparisons | >0.9999 |
| fl/fl CKD vs. csSIRP $\alpha^+$ CKD              | Kruskal-Wallis-Dunn's Multiple Comparisons | >0.9999 |
| Creatinine                                       |                                            |         |
| fl/fl Sham vs. fl/fl CKD                         | Kruskal-Wallis-Dunn's Multiple Comparisons | 0.0017  |
| csSIRP $\alpha^+$ Sham vs. csSIRP $\alpha^+$ CKD | Kruskal-Wallis-Dunn's Multiple Comparisons | 0.0038  |
| fl/fl Sham vs. csSIRP $\alpha^+$ Sham            | Kruskal-Wallis-Dunn's Multiple Comparisons | >0.9999 |
| fl/fl CKD vs. csSIRP $\alpha^+$ CKD              | Kruskal-Wallis-Dunn's Multiple Comparisons | >0.9999 |
| <b>S5A</b>                                       |                                            |         |
| fl/fl PBS vs. HG                                 | Mann-Whitney                               | 0.0004  |
| AD-SIRP $\alpha^+$ PBS vs. HG                    | Mann-Whitney                               | 0.0026  |
| csSIRP $\alpha^+$ PBS vs. HG                     | Mann-Whitney                               | 0.0904  |
| mSIRP $\alpha^+$ PBS vs. HG                      | Mann-Whitney                               | 0.8609  |
| <b>S5B</b>                                       |                                            |         |
| Heart-PBS vs. HG                                 | Mann-Whitney                               | 0.0152  |
| Gastrocnemius-PBS vs. HG                         | Mann-Whitney                               | 0.0159  |
| <b>S5C</b>                                       | Mann-Whitney                               | 0.0006  |
| <b>S5D</b>                                       | Mann-Whitney                               | 0.0079  |
| <b>S5E</b>                                       | Mann-Whitney                               | 0.2403  |
| <b>S5F</b>                                       |                                            |         |
| SIRP $\alpha$ 0 vs. 1 h PCS                      | Mann-Whitney                               | 0.2222  |
| SIRP $\alpha$ 0 vs. 6 h PCS                      | Mann-Whitney                               | 0.5159  |
| SIRP $\alpha$ 0 vs. 24 h PCS                     | Mann-Whitney                               | 0.0238  |
| pAKT 0 vs. 1 h PCS                               | Mann-Whitney                               | 0.0952  |
| pAKT 0 vs. 6 h PCS                               | Mann-Whitney                               | 0.1508  |
| pAKT 0 vs. 24 h PCS                              | Mann-Whitney                               | 0.0079  |
| <b>S5G</b>                                       |                                            |         |
| 0 vs. 1 h PCS                                    | Mann-Whitney                               | 0.6857  |
| 0 vs. 6 h PCS                                    | Mann-Whitney                               | 0.1143  |
| 0 vs. 24 h PCS                                   | Mann-Whitney                               | 0.0286  |

**TABLES****Table S2**

|                                                |                       |         |
|------------------------------------------------|-----------------------|---------|
| LVAWd (mm)                                     |                       |         |
| WT CKD vs. SIRP $\alpha$ Mt CKD                | Kruskal-Wallis-Dunn's | >0.9999 |
| WT CKD vs. WT Sham                             | Kruskal-Wallis-Dunn's | 0.3188  |
| WT CKD vs. SIRP $\alpha$ Mt Sham               | Kruskal-Wallis-Dunn's | 0.9802  |
| SIRP $\alpha$ Mt CKD vs. WT Sham               | Kruskal-Wallis-Dunn's | 0.3218  |
| SIRP $\alpha$ Mt CKD vs. SIRP $\alpha$ Mt Sham | Kruskal-Wallis-Dunn's | >0.9999 |
| WT Sham vs. SIRP $\alpha$ Mt Sham              | Kruskal-Wallis-Dunn's | >0.9999 |
| LVAWs (mm)                                     |                       |         |
| WT CKD vs. SIRP $\alpha$ Mt CKD                | Kruskal-Wallis-Dunn's | 0.2915  |
| WT CKD vs. WT Sham                             | Kruskal-Wallis-Dunn's | 0.1432  |
| WT CKD vs. SIRP $\alpha$ Mt Sham               | Kruskal-Wallis-Dunn's | 0.0697  |
| SIRP $\alpha$ Mt CKD vs. WT Sham               | Kruskal-Wallis-Dunn's | >0.9999 |
| SIRP $\alpha$ Mt CKD vs. SIRP $\alpha$ Mt Sham | Kruskal-Wallis-Dunn's | >0.9999 |
| WT Sham vs. SIRP $\alpha$ Mt Sham              | Kruskal-Wallis-Dunn's | >0.9999 |
| LVIDd (mm)                                     |                       |         |
| WT CKD vs. SIRP $\alpha$ Mt CKD                | Kruskal-Wallis-Dunn's | 0.0756  |
| WT CKD vs. WT Sham                             | Kruskal-Wallis-Dunn's | >0.9999 |
| WT CKD vs. SIRP $\alpha$ Mt Sham               | Kruskal-Wallis-Dunn's | 0.3898  |
| SIRP $\alpha$ Mt CKD vs. WT Sham               | Kruskal-Wallis-Dunn's | 0.0349  |
| SIRP $\alpha$ Mt CKD vs. SIRP $\alpha$ Mt Sham | Kruskal-Wallis-Dunn's | >0.9999 |
| WT Sham vs. SIRP $\alpha$ Mt Sham              | Kruskal-Wallis-Dunn's | 0.2252  |
| LVIDs (mm)                                     |                       |         |
| WT CKD vs. SIRP $\alpha$ Mt CKD                | Kruskal-Wallis-Dunn's | >0.9999 |
| WT CKD vs. WT Sham                             | Kruskal-Wallis-Dunn's | 0.1143  |
| WT CKD vs. SIRP $\alpha$ Mt Sham               | Kruskal-Wallis-Dunn's | 0.7719  |
| SIRP $\alpha$ Mt CKD vs. WT Sham               | Kruskal-Wallis-Dunn's | 0.171   |
| SIRP $\alpha$ Mt CKD vs. SIRP $\alpha$ Mt Sham | Kruskal-Wallis-Dunn's | >0.9999 |
| WT Sham vs. SIRP $\alpha$ Mt Sham              | Kruskal-Wallis-Dunn's | >0.9999 |
| LVPWd (mm)                                     |                       |         |
| WT CKD vs. SIRP $\alpha$ Mt CKD                | Kruskal-Wallis-Dunn's | >0.9999 |
| WT CKD vs. WT Sham                             | Kruskal-Wallis-Dunn's | 0.1288  |
| WT CKD vs. SIRP $\alpha$ Mt Sham               | Kruskal-Wallis-Dunn's | >0.9999 |
| SIRP $\alpha$ Mt CKD vs. WT Sham               | Kruskal-Wallis-Dunn's | 0.3308  |
| SIRP $\alpha$ Mt CKD vs. SIRP $\alpha$ Mt Sham | Kruskal-Wallis-Dunn's | >0.9999 |
| WT Sham vs. SIRP $\alpha$ Mt Sham              | Kruskal-Wallis-Dunn's | >0.9999 |
| LVPWs (mm)                                     |                       |         |
| WT CKD vs. SIRP $\alpha$ Mt CKD                | Kruskal-Wallis-Dunn's | >0.9999 |
| WT CKD vs. WT Sham                             | Kruskal-Wallis-Dunn's | 0.2932  |
| WT CKD vs. SIRP $\alpha$ Mt Sham               | Kruskal-Wallis-Dunn's | 0.0102  |
| SIRP $\alpha$ Mt CKD vs. WT Sham               | Kruskal-Wallis-Dunn's | >0.9999 |
| SIRP $\alpha$ Mt CKD vs. SIRP $\alpha$ Mt Sham | Kruskal-Wallis-Dunn's | 0.2612  |
| WT Sham vs. SIRP $\alpha$ Mt Sham              | Kruskal-Wallis-Dunn's | >0.9999 |
| LV/Height (mg/mm)                              |                       |         |
| WT CKD vs. SIRP $\alpha$ Mt CKD                | Kruskal-Wallis-Dunn's | 0.0779  |
| WT CKD vs. WT Sham                             | Kruskal-Wallis-Dunn's | >0.9999 |
| WT CKD vs. SIRP $\alpha$ Mt Sham               | Kruskal-Wallis-Dunn's | 0.036   |
| SIRP $\alpha$ Mt CKD vs. WT Sham               | Kruskal-Wallis-Dunn's | 0.9635  |
| SIRP $\alpha$ Mt CKD vs. SIRP $\alpha$ Mt Sham | Kruskal-Wallis-Dunn's | >0.9999 |

|                                                               |                       |         |
|---------------------------------------------------------------|-----------------------|---------|
| WT Sham vs. SIRP $\alpha$ Mt Sham<br>LV/BW (mg/g)             | Kruskal-Wallis-Dunn's | 0.5362  |
| WT Sham vs. WT CKD                                            | Kruskal-Wallis-Dunn's | 0.035   |
| WT Sham vs. SIRP $\alpha$ Mt Sham                             | Kruskal-Wallis-Dunn's | 0.0819  |
| WT Sham vs. SIRP $\alpha$ Mt CKD                              | Kruskal-Wallis-Dunn's | 0.0073  |
| WT CKD vs. SIRP $\alpha$ Mt Sham                              | Kruskal-Wallis-Dunn's | >0.9999 |
| WT CKD vs. SIRP $\alpha$ Mt CKD                               | Kruskal-Wallis-Dunn's | >0.9999 |
| SIRP $\alpha$ Mt Sham vs. SIRP $\alpha$ Mt CKD<br>CO (mL/min) | Kruskal-Wallis-Dunn's | >0.9999 |
| WT CKD vs. SIRP $\alpha$ Mt CKD                               | Kruskal-Wallis-Dunn's | 0.004   |
| WT CKD vs. WT Sham                                            | Kruskal-Wallis-Dunn's | 0.2352  |
| WT CKD vs. SIRP $\alpha$ Mt Sham                              | Kruskal-Wallis-Dunn's | 0.0002  |
| SIRP $\alpha$ Mt CKD vs. WT Sham                              | Kruskal-Wallis-Dunn's | >0.9999 |
| SIRP $\alpha$ Mt CKD vs. SIRP $\alpha$ Mt Sham                | Kruskal-Wallis-Dunn's | >0.9999 |
| WT Sham vs. SIRP $\alpha$ Mt Sham<br>EF (%)                   | Kruskal-Wallis-Dunn's | 0.2195  |
| WT CKD vs. SIRP $\alpha$ Mt CKD                               | Kruskal-Wallis-Dunn's | 0.3606  |
| WT CKD vs. WT Sham                                            | Kruskal-Wallis-Dunn's | 0.0903  |
| WT CKD vs. SIRP $\alpha$ Mt Sham                              | Kruskal-Wallis-Dunn's | 0.006   |
| SIRP $\alpha$ Mt CKD vs. WT Sham                              | Kruskal-Wallis-Dunn's | >0.9999 |
| SIRP $\alpha$ Mt CKD vs. SIRP $\alpha$ Mt Sham                | Kruskal-Wallis-Dunn's | 0.7954  |
| WT Sham vs. SIRP $\alpha$ Mt Sham<br>FS (%)                   | Kruskal-Wallis-Dunn's | >0.9999 |
| WT Sham vs. WT CKD                                            | Kruskal-Wallis-Dunn's | 0.1477  |
| WT Sham vs. SIRP $\alpha$ Mt Sham                             | Kruskal-Wallis-Dunn's | >0.9999 |
| WT Sham vs. SIRP $\alpha$ Mt CKD                              | Kruskal-Wallis-Dunn's | >0.9999 |
| WT CKD vs. SIRP $\alpha$ Mt Sham                              | Kruskal-Wallis-Dunn's | 0.0046  |
| WT CKD vs. SIRP $\alpha$ Mt CKD                               | Kruskal-Wallis-Dunn's | 0.2764  |
| SIRP $\alpha$ Mt Sham vs. SIRP $\alpha$ Mt CKD<br>HR (bpm)    | Kruskal-Wallis-Dunn's | 0.8547  |
| WT CKD vs. SIRP $\alpha$ Mt CKD                               | Kruskal-Wallis-Dunn's | >0.9999 |
| WT CKD vs. WT Sham                                            | Kruskal-Wallis-Dunn's | >0.9999 |
| WT CKD vs. SIRP $\alpha$ Mt Sham                              | Kruskal-Wallis-Dunn's | >0.9999 |
| SIRP $\alpha$ Mt CKD vs. WT Sham                              | Kruskal-Wallis-Dunn's | >0.9999 |
| SIRP $\alpha$ Mt CKD vs. SIRP $\alpha$ Mt Sham                | Kruskal-Wallis-Dunn's | 0.6144  |
| WT Sham vs. SIRP $\alpha$ Mt Sham<br>SV ( $\mu$ L)            | Kruskal-Wallis-Dunn's | >0.9999 |
| WT CKD vs. SIRP $\alpha$ Mt CKD                               | Kruskal-Wallis-Dunn's | 0.0149  |
| WT CKD vs. WT Sham                                            | Kruskal-Wallis-Dunn's | >0.9999 |
| WT CKD vs. SIRP $\alpha$ Mt Sham                              | Kruskal-Wallis-Dunn's | 0.0038  |
| SIRP $\alpha$ Mt CKD vs. WT Sham                              | Kruskal-Wallis-Dunn's | 0.2654  |
| SIRP $\alpha$ Mt CKD vs. SIRP $\alpha$ Mt Sham                | Kruskal-Wallis-Dunn's | >0.9999 |
| WT Sham vs. SIRP $\alpha$ Mt Sham<br>RWT (mm)                 | Kruskal-Wallis-Dunn's | 0.0882  |
| WT CKD vs. SIRP $\alpha$ Mt CKD                               | Kruskal-Wallis-Dunn's | >0.9999 |
| WT CKD vs. WT Sham                                            | Kruskal-Wallis-Dunn's | 0.3677  |
| WT CKD vs. SIRP $\alpha$ Mt Sham                              | Kruskal-Wallis-Dunn's | >0.9999 |
| SIRP $\alpha$ Mt CKD vs. WT Sham                              | Kruskal-Wallis-Dunn's | 0.0389  |
| SIRP $\alpha$ Mt CKD vs. SIRP $\alpha$ Mt Sham                | Kruskal-Wallis-Dunn's | >0.9999 |
| WT Sham vs. SIRP $\alpha$ Mt Sham                             | Kruskal-Wallis-Dunn's | >0.9999 |
| E/A                                                           |                       |         |

|                                                |                       |         |
|------------------------------------------------|-----------------------|---------|
| WT Sham vs. WT CKD                             | Kruskal-Wallis-Dunn's | 0.0854  |
| WT Sham vs. SIRP $\alpha$ Mt Sham              | Kruskal-Wallis-Dunn's | >0.9999 |
| WT Sham vs. SIRP $\alpha$ Mt CKD               | Kruskal-Wallis-Dunn's | >0.9999 |
| WT CKD vs. SIRP $\alpha$ Mt Sham               | Kruskal-Wallis-Dunn's | >0.9999 |
| WT CKD vs. SIRP $\alpha$ Mt CKD                | Kruskal-Wallis-Dunn's | 0.2602  |
| SIRP $\alpha$ Mt Sham vs. SIRP $\alpha$ Mt CKD | Kruskal-Wallis-Dunn's | >0.9999 |
| E/e'                                           |                       |         |
| WT Sham vs. WT CKD                             | Kruskal-Wallis-Dunn's | >0.9999 |
| WT Sham vs. SIRP $\alpha$ Mt Sham              | Kruskal-Wallis-Dunn's | >0.9999 |
| WT Sham vs. SIRP $\alpha$ Mt CKD               | Kruskal-Wallis-Dunn's | >0.9999 |
| WT CKD vs. SIRP $\alpha$ Mt Sham               | Kruskal-Wallis-Dunn's | >0.9999 |
| WT CKD vs. SIRP $\alpha$ Mt CKD                | Kruskal-Wallis-Dunn's | >0.9999 |
| SIRP $\alpha$ Mt Sham vs. SIRP $\alpha$ Mt CKD | Kruskal-Wallis-Dunn's | >0.9999 |
| MPI                                            |                       |         |
| WT Sham vs. WT CKD                             | Kruskal-Wallis-Dunn's | >0.9999 |
| WT Sham vs. SIRP $\alpha$ Mt Sham              | Kruskal-Wallis-Dunn's | >0.9999 |
| WT Sham vs. SIRP $\alpha$ Mt CKD               | Kruskal-Wallis-Dunn's | >0.9999 |
| WT CKD vs. SIRP $\alpha$ Mt Sham               | Kruskal-Wallis-Dunn's | >0.9999 |
| WT CKD vs. SIRP $\alpha$ Mt CKD                | Kruskal-Wallis-Dunn's | >0.9999 |
| SIRP $\alpha$ Mt Sham vs. SIRP $\alpha$ Mt CKD | Kruskal-Wallis-Dunn's | >0.9999 |

**Table S3**

fl/fl CKD vs. csSIRP $\alpha$ -CKD

|               |              |         |
|---------------|--------------|---------|
| LVAWd (mm)    | Mann-Whitney | 0.4286  |
| LVAWs (mm)    | Mann-Whitney | 0.0823  |
| LVIDd (mm)    | Mann-Whitney | 0.1775  |
| LVIDs (mm)    | Mann-Whitney | >0.9999 |
| LVPWd (mm)    | Mann-Whitney | 0.329   |
| LVPWs (mm)    | Mann-Whitney | 0.9307  |
| LV Mass (mg)  | Mann-Whitney | 0.4286  |
| CO (mL/min)   | Mann-Whitney | 0.0043  |
| EF (%)        | Mann-Whitney | 0.0173  |
| FS (%)        | Mann-Whitney | 0.0173  |
| HR (bpm)      | Mann-Whitney | 0.1775  |
| SV ( $\mu$ L) | Mann-Whitney | 0.0043  |
